# Supplementary material for: Histological and molecular glioblastoma, IDH-wildtype: a real-world landscape using the 2021 WHO classification of central nervous system tumors
Source: PubMed Central journal article supplement (PMC10358772; doi:10.3389/fonc.2023.1200815), 2023-07-06
Supplement: Image_3.pdf [file Image_3.pdf]

Supplementary Figure 3. Kaplan–Meier curves showing no significant effects of certain genetic and immunohistochemical alterations on the overall survival of patients with molecular glioblastomas (1-31). Since the numbers of patients divided into two groups (e.g. FGFR1 Wildtype/FGFR1 Alteration) using different parameters varied, we only enrolled the parameters using which the number of patients in either group was above 3. Parameters used in this section were shown as follows.

|      |                                   |    |
|------|-----------------------------------|----|
| (1)  | Age .....                         | 1  |
| (2)  | Stupp protocol .....              | 2  |
| (3)  | NeuN .....                        | 3  |
| (4)  | Syn .....                         | 4  |
| (5)  | MGMT promotor methylation.....    | 5  |
| (6)  | TERT promotor mutation .....      | 6  |
| (7)  | EGFR Amplification .....          | 7  |
| (8)  | CDKN2A/B homozygous deletion..... | 8  |
| (9)  | BRAF .....                        | 9  |
| (10) | FGFR1 .....                       | 10 |
| (11) | FGFR2.....                        | 11 |
| (12) | FGFR4.....                        | 12 |
| (13) | KIT .....                         | 13 |
| (14) | KRAS .....                        | 14 |
| (15) | MET .....                         | 15 |
| (16) | MYB.....                          | 16 |
| (17) | MYBL1 .....                       | 17 |
| (18) | MYC.....                          | 18 |
| (19) | MYCN .....                        | 19 |
| (20) | NF1.....                          | 20 |
| (21) | NOTCH1 .....                      | 21 |
| (22) | NTRK2.....                        | 22 |
| (23) | NTRK3.....                        | 23 |
| (24) | PDGFRA .....                      | 24 |
| (25) | PEG3 .....                        | 25 |
| (26) | PIK3CA.....                       | 26 |
| (27) | PPM1D .....                       | 27 |
| (28) | PTEN .....                        | 28 |
| (29) | PTPN11 .....                      | 29 |
| (30) | RB1 .....                         | 30 |
| (31) | TOP3A .....                       | 31 |

(1)

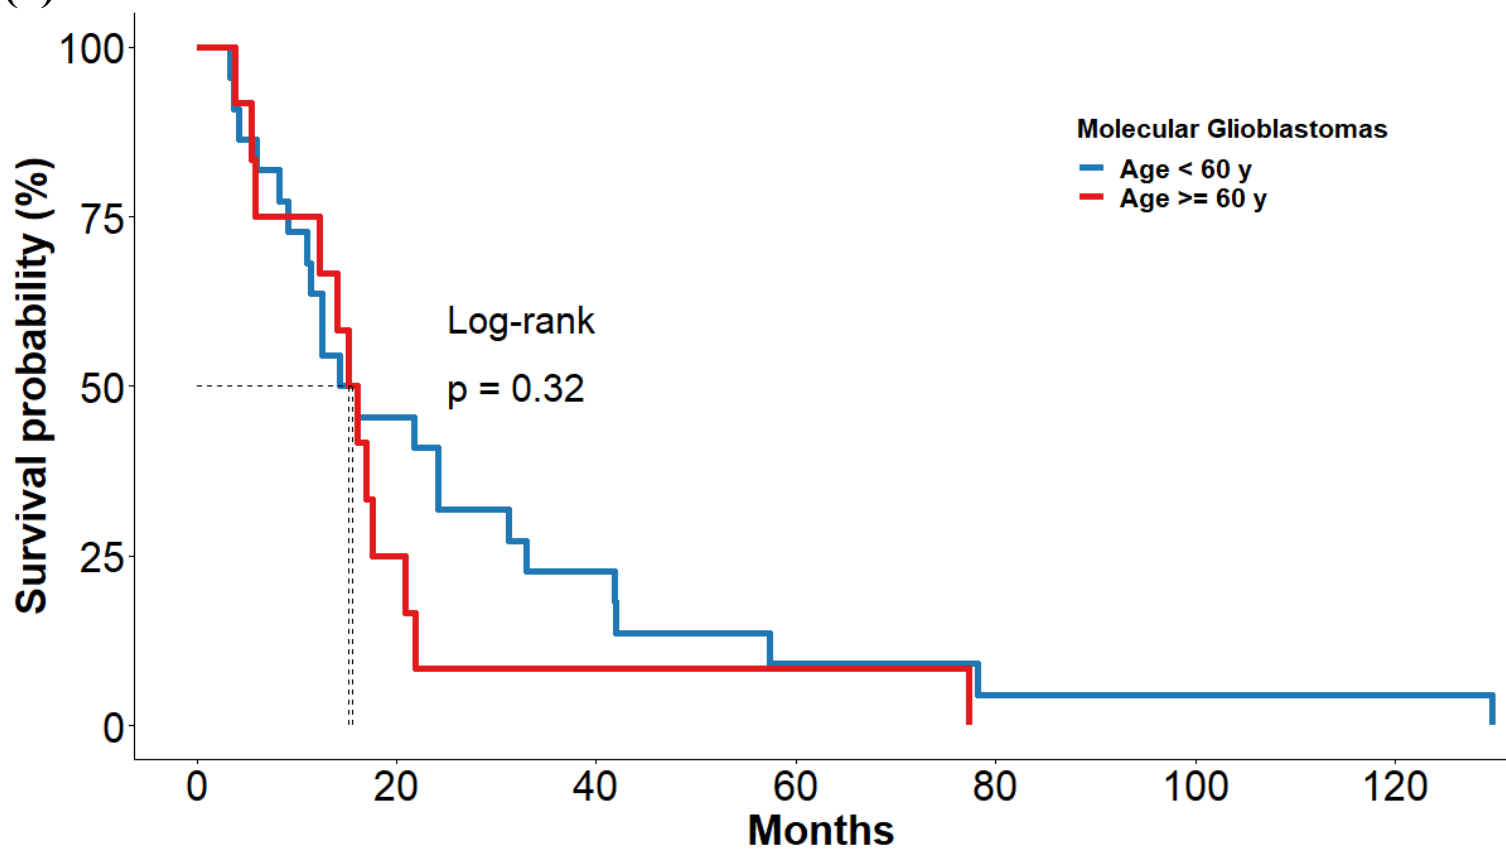

22  
12

10  
3

5  
1

2  
1

1  
0

1  
0

1  
0

(2)

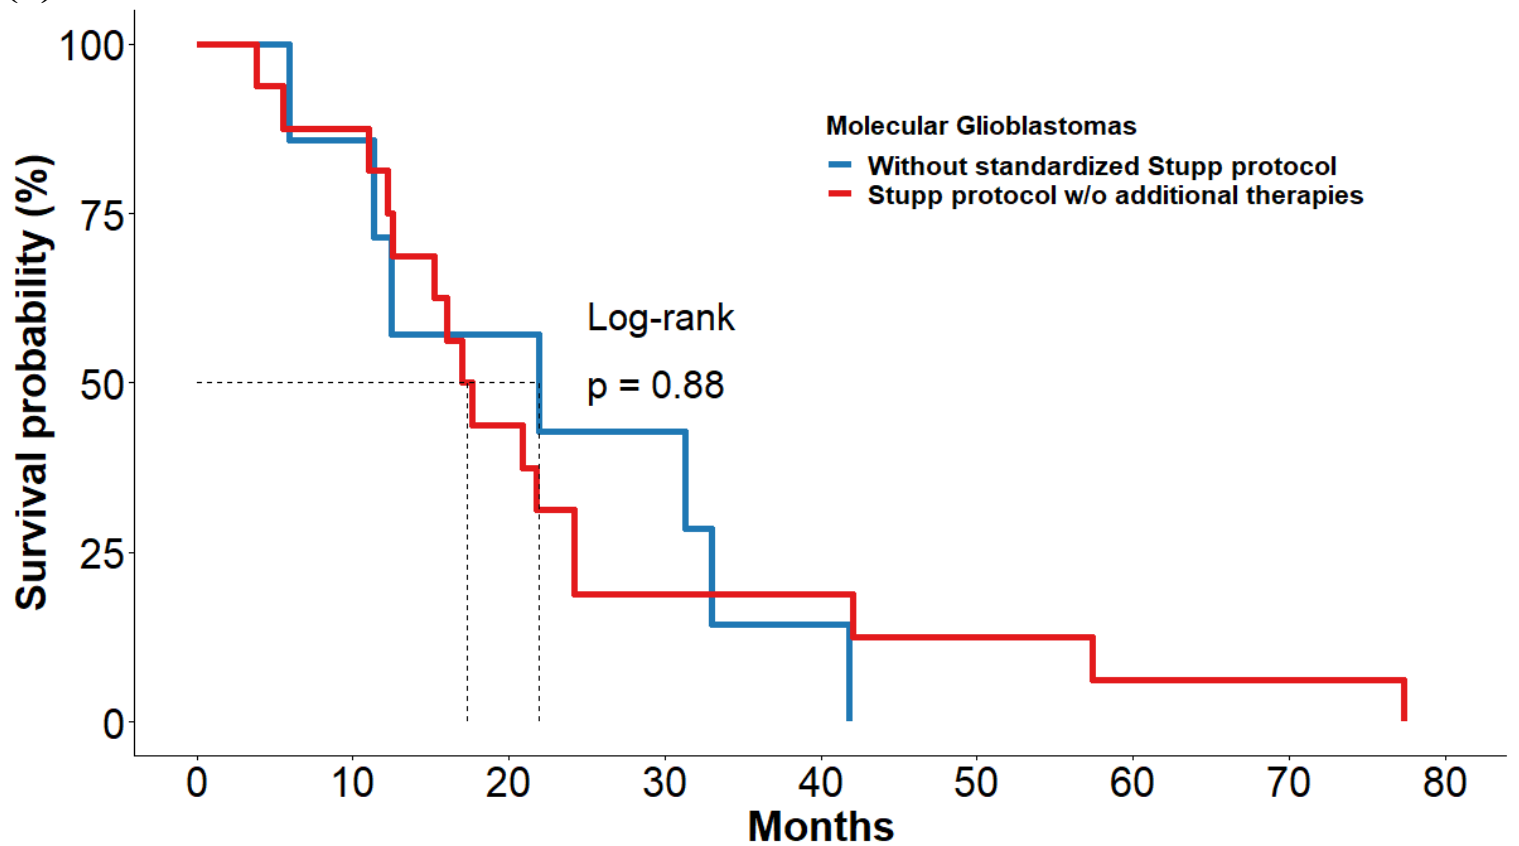

|   |    |    |   |   |   |   |   |   |   |
|---|----|----|---|---|---|---|---|---|---|
| — | 7  | 6  | 4 | 3 | 1 | 0 | 0 | 0 | 0 |
| — | 16 | 14 | 7 | 3 | 3 | 2 | 1 | 1 | 0 |

(3)

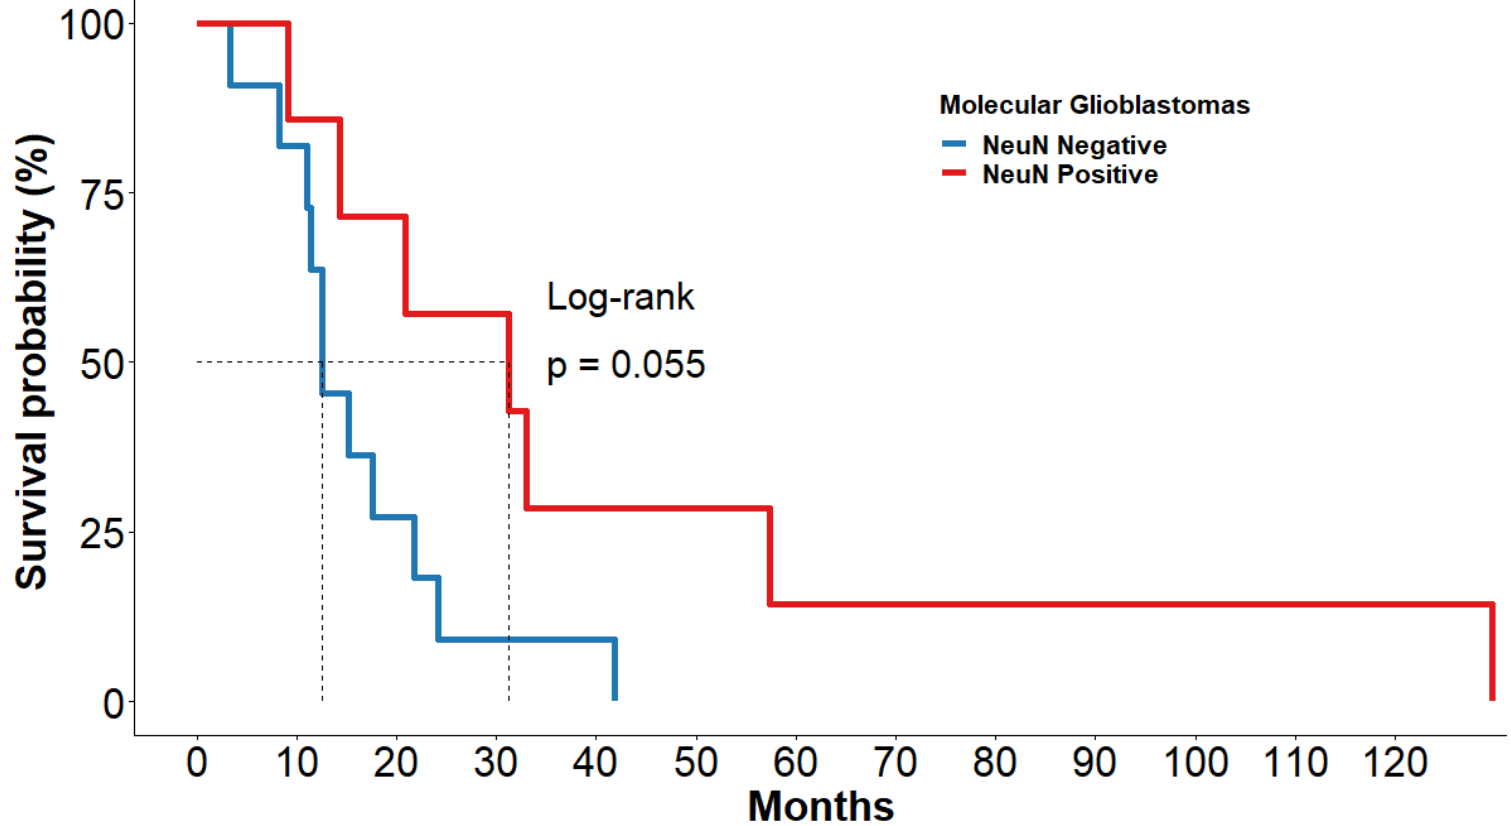

(4)

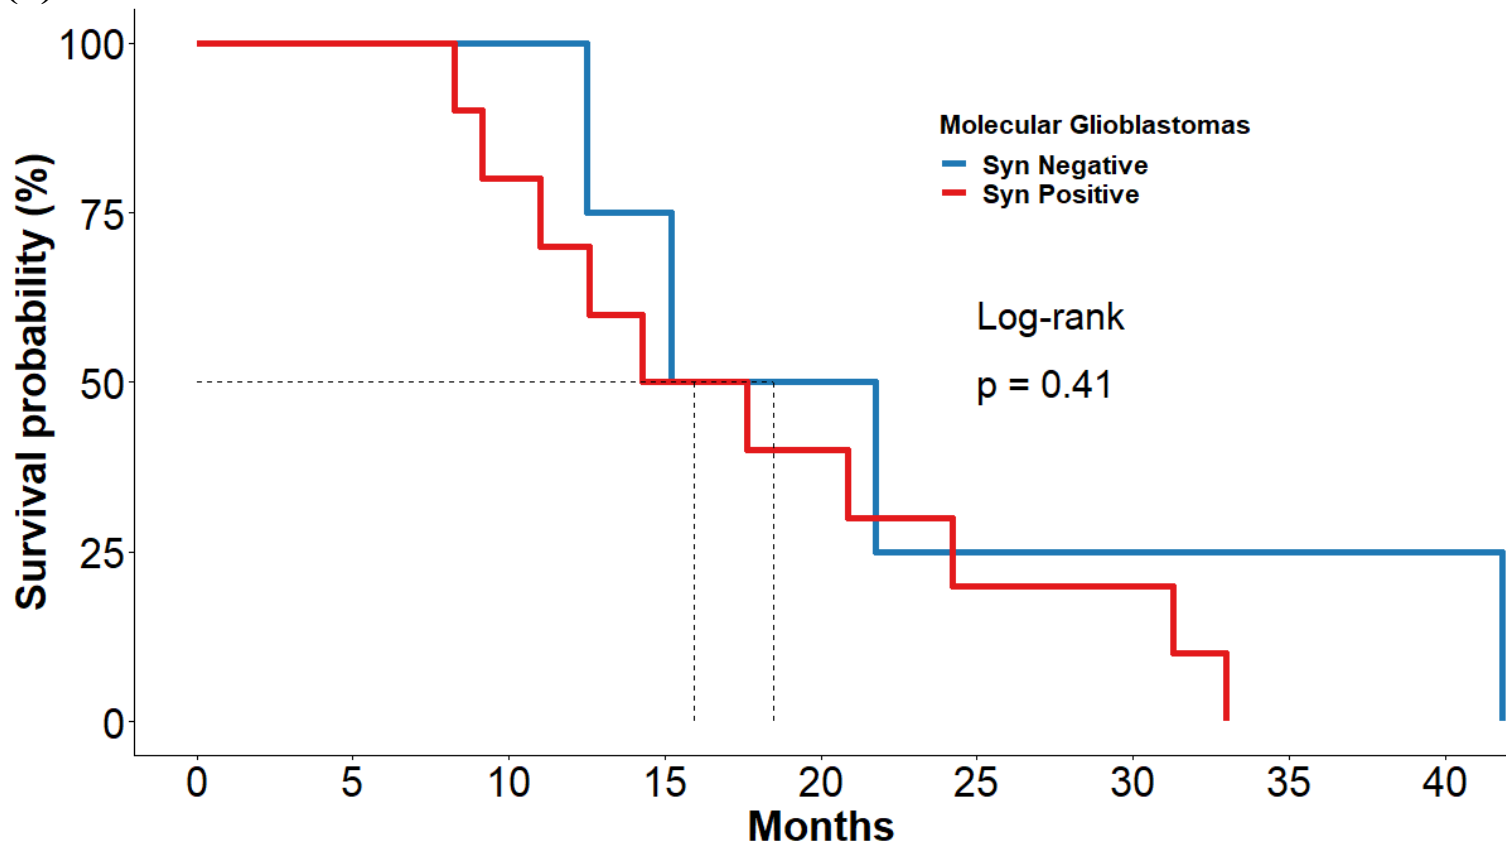

|   |    |    |   |   |   |   |   |   |   |
|---|----|----|---|---|---|---|---|---|---|
| — | 4  | 4  | 4 | 3 | 2 | 1 | 1 | 1 | 1 |
| — | 10 | 10 | 8 | 5 | 4 | 2 | 2 | 0 | 0 |

(5)

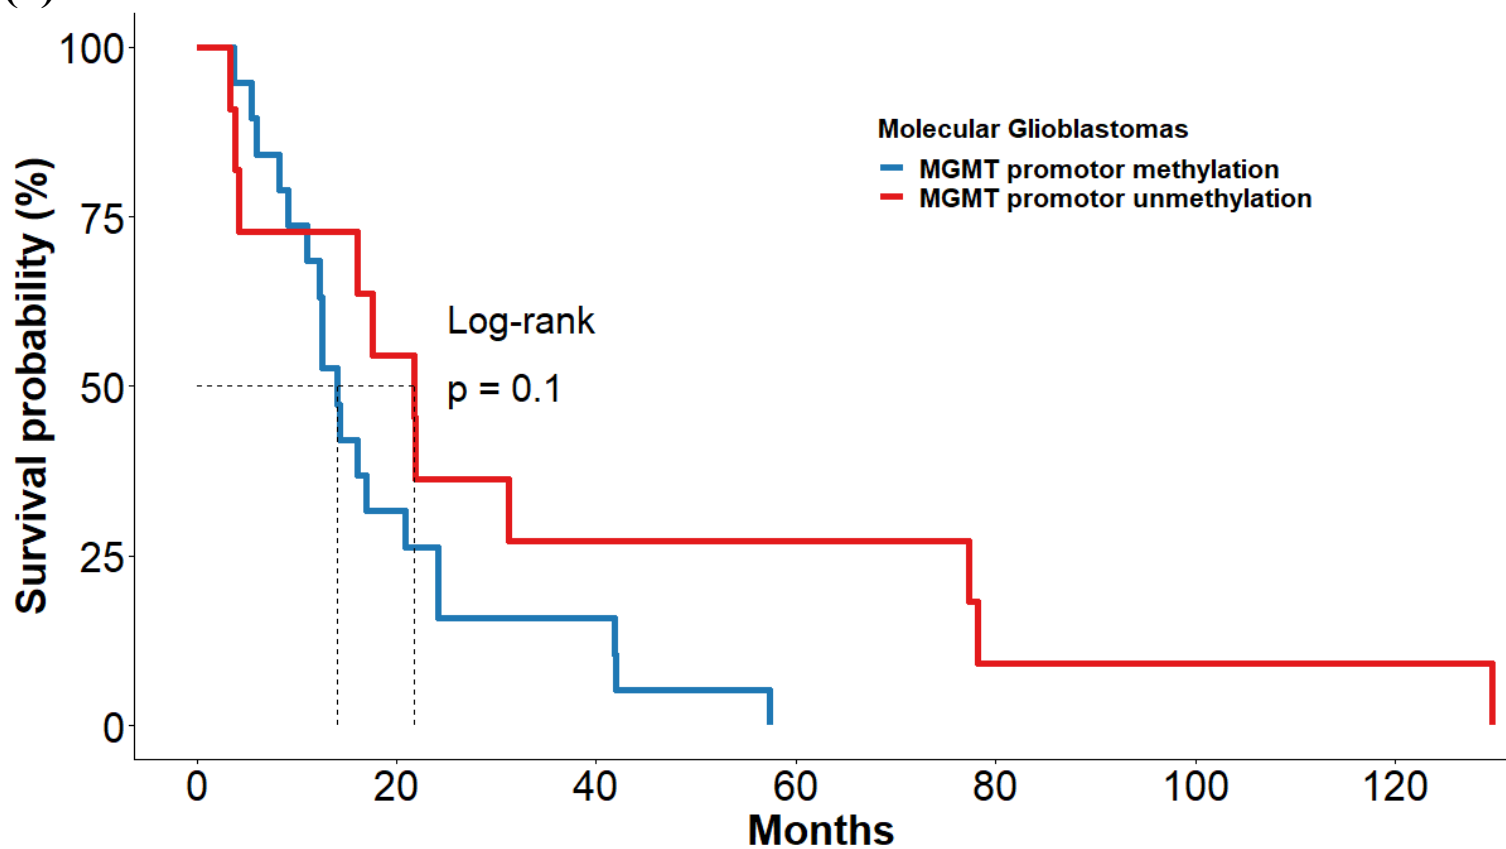

— 19  
— 11

6  
6

3  
3

0  
3

0  
1

0  
1

0  
1

(6)

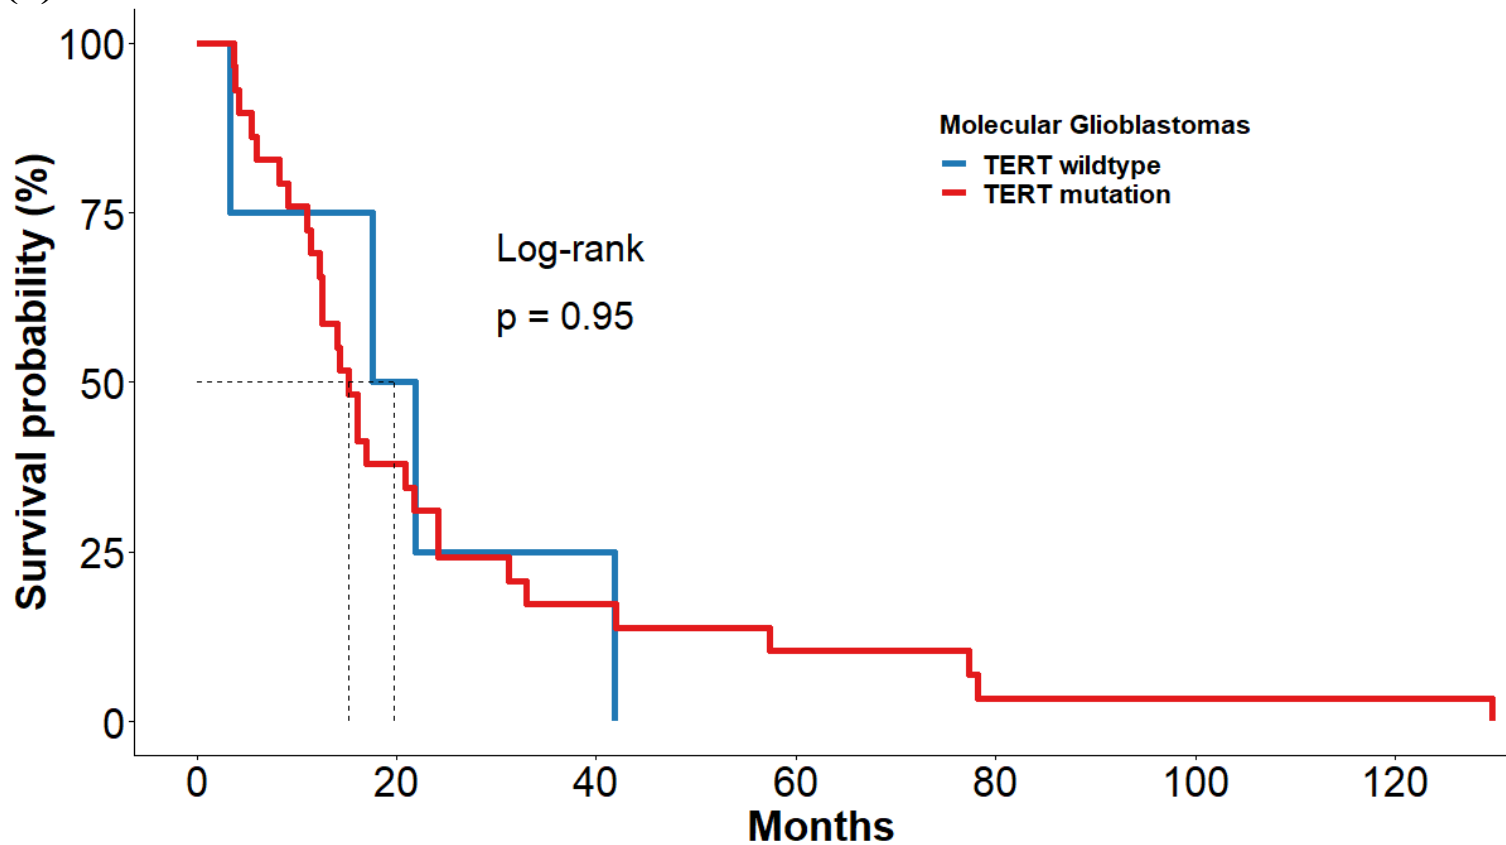

|   |    |    |   |   |   |   |   |
|---|----|----|---|---|---|---|---|
| — | 4  | 2  | 1 | 0 | 0 | 0 | 0 |
| — | 29 | 11 | 5 | 3 | 1 | 1 | 1 |

(7)

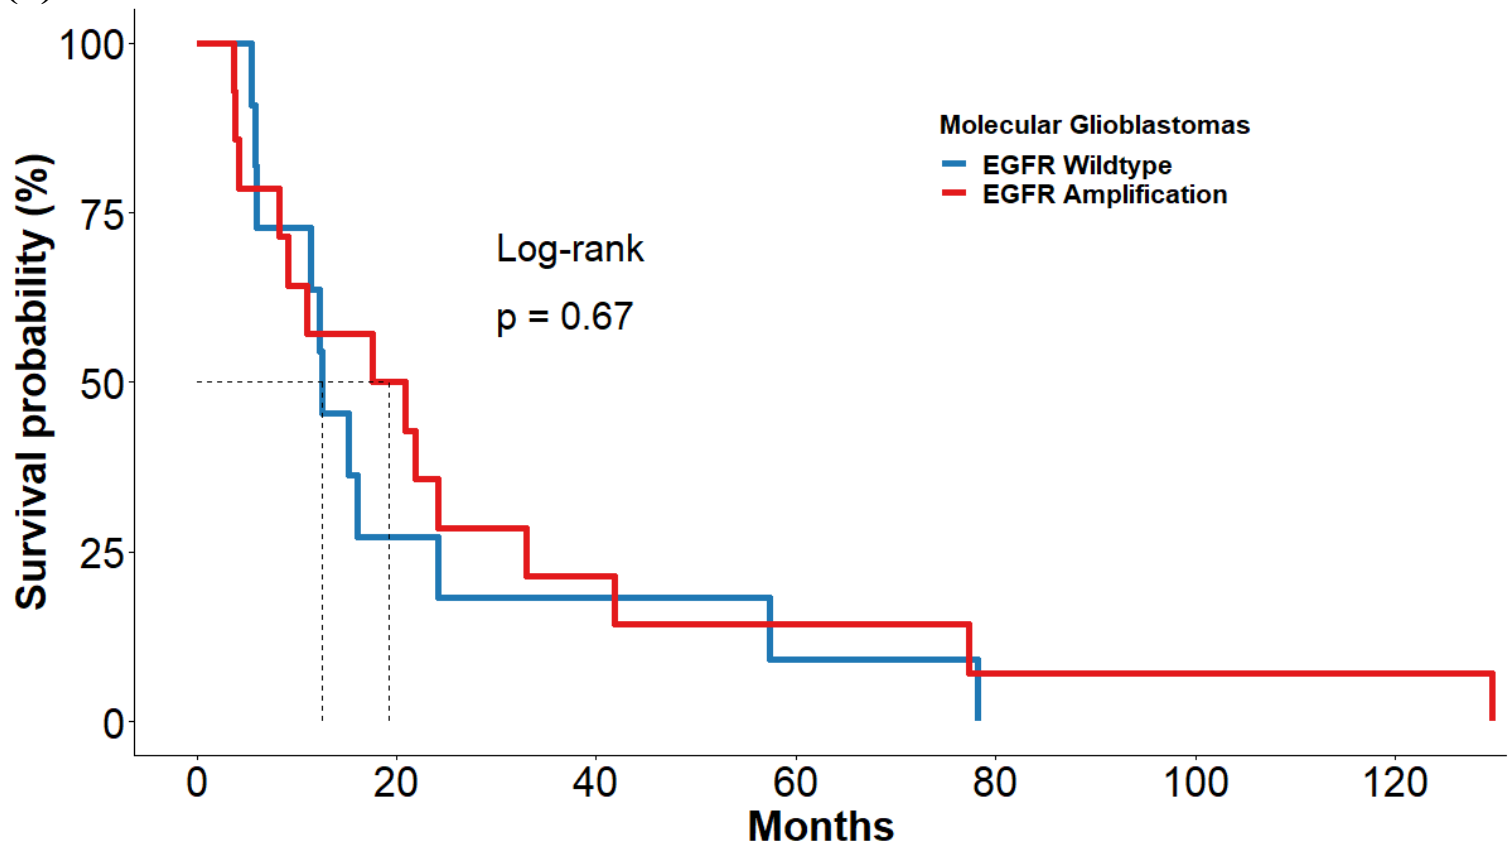

|   |    |   |   |   |   |   |   |
|---|----|---|---|---|---|---|---|
| — | 11 | 3 | 2 | 1 | 0 | 0 | 0 |
| — | 14 | 7 | 3 | 2 | 1 | 1 | 1 |



(8)

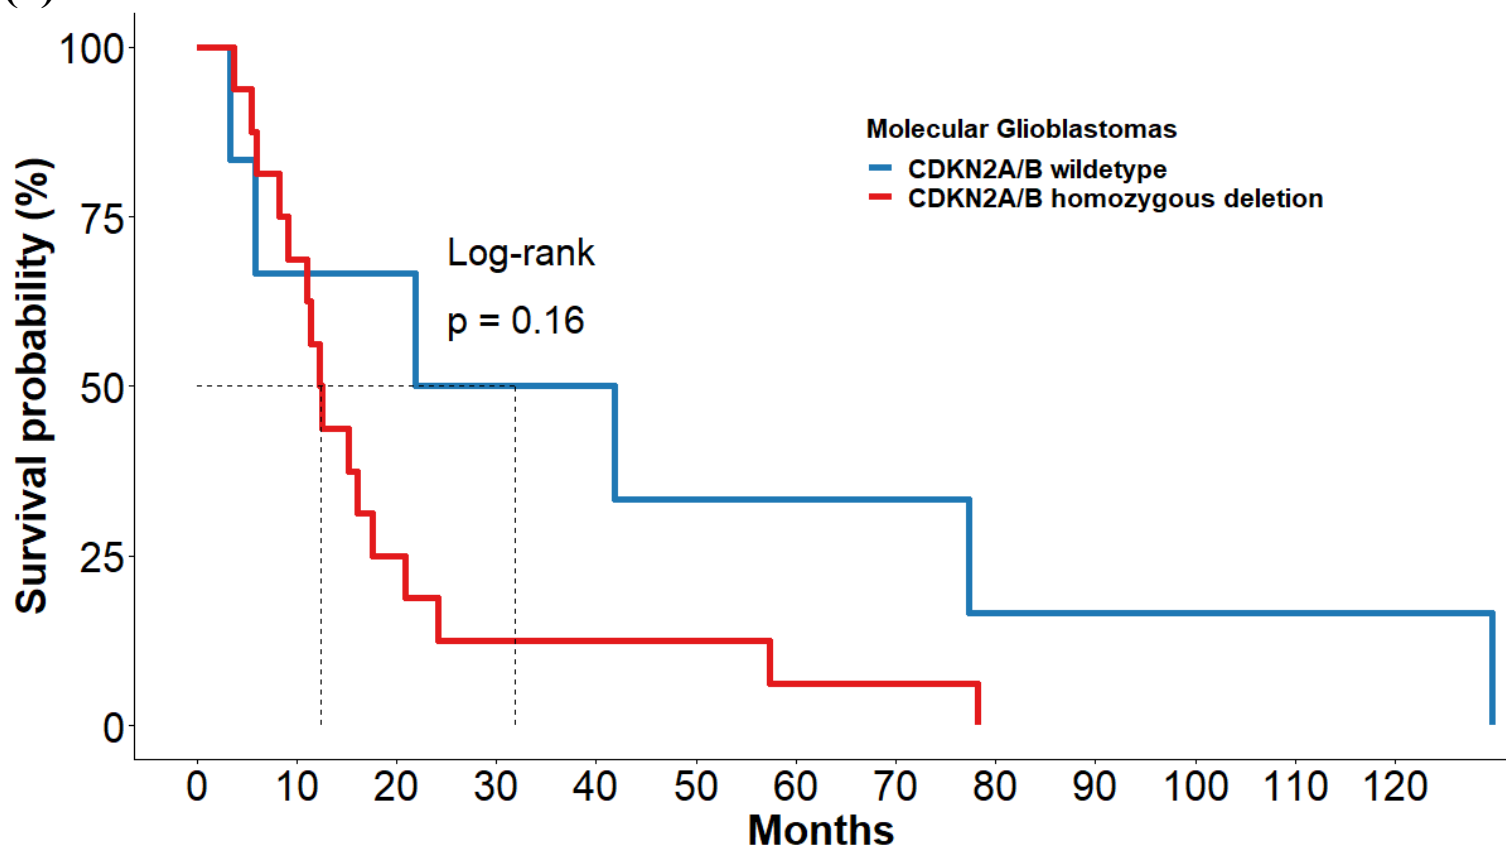

|   |    |    |   |   |   |   |   |   |   |   |   |   |   |
|---|----|----|---|---|---|---|---|---|---|---|---|---|---|
| — | 6  | 4  | 4 | 3 | 3 | 2 | 2 | 2 | 1 | 1 | 1 | 1 | 1 |
| — | 16 | 11 | 4 | 2 | 2 | 2 | 1 | 1 | 0 | 0 | 0 | 0 | 0 |

(9)

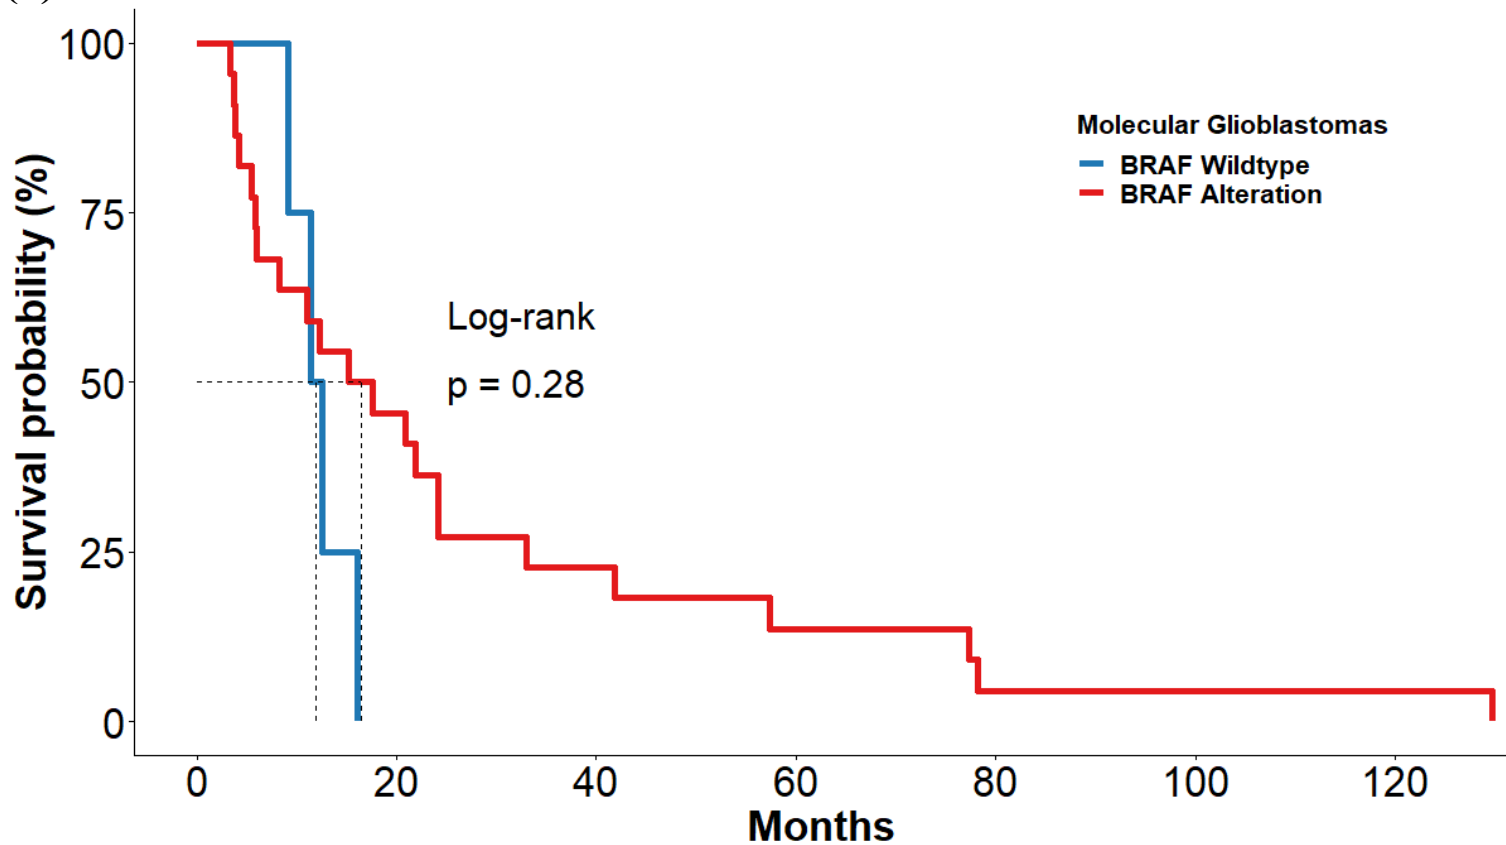

|   |    |    |   |   |   |   |   |   |
|---|----|----|---|---|---|---|---|---|
| — | 4  | 0  | 0 | 0 | 0 | 0 | 0 | 0 |
| — | 22 | 10 | 5 | 3 | 1 | 1 | 1 | 1 |

(10)

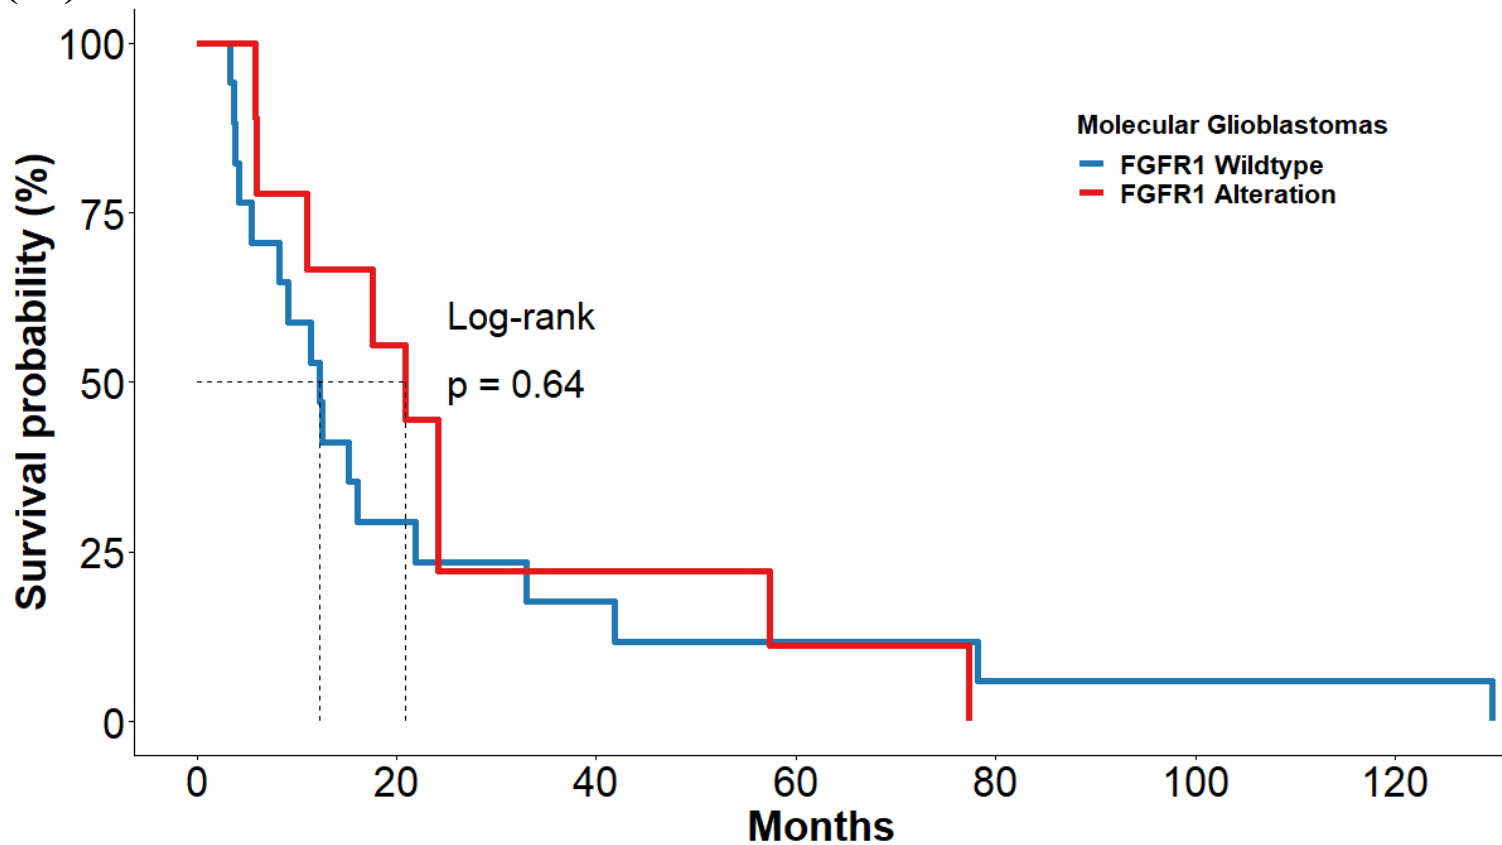

|   |    |   |   |   |   |   |   |
|---|----|---|---|---|---|---|---|
| — | 17 | 5 | 3 | 2 | 1 | 1 | 1 |
| — | 9  | 5 | 2 | 1 | 0 | 0 | 0 |

(11)

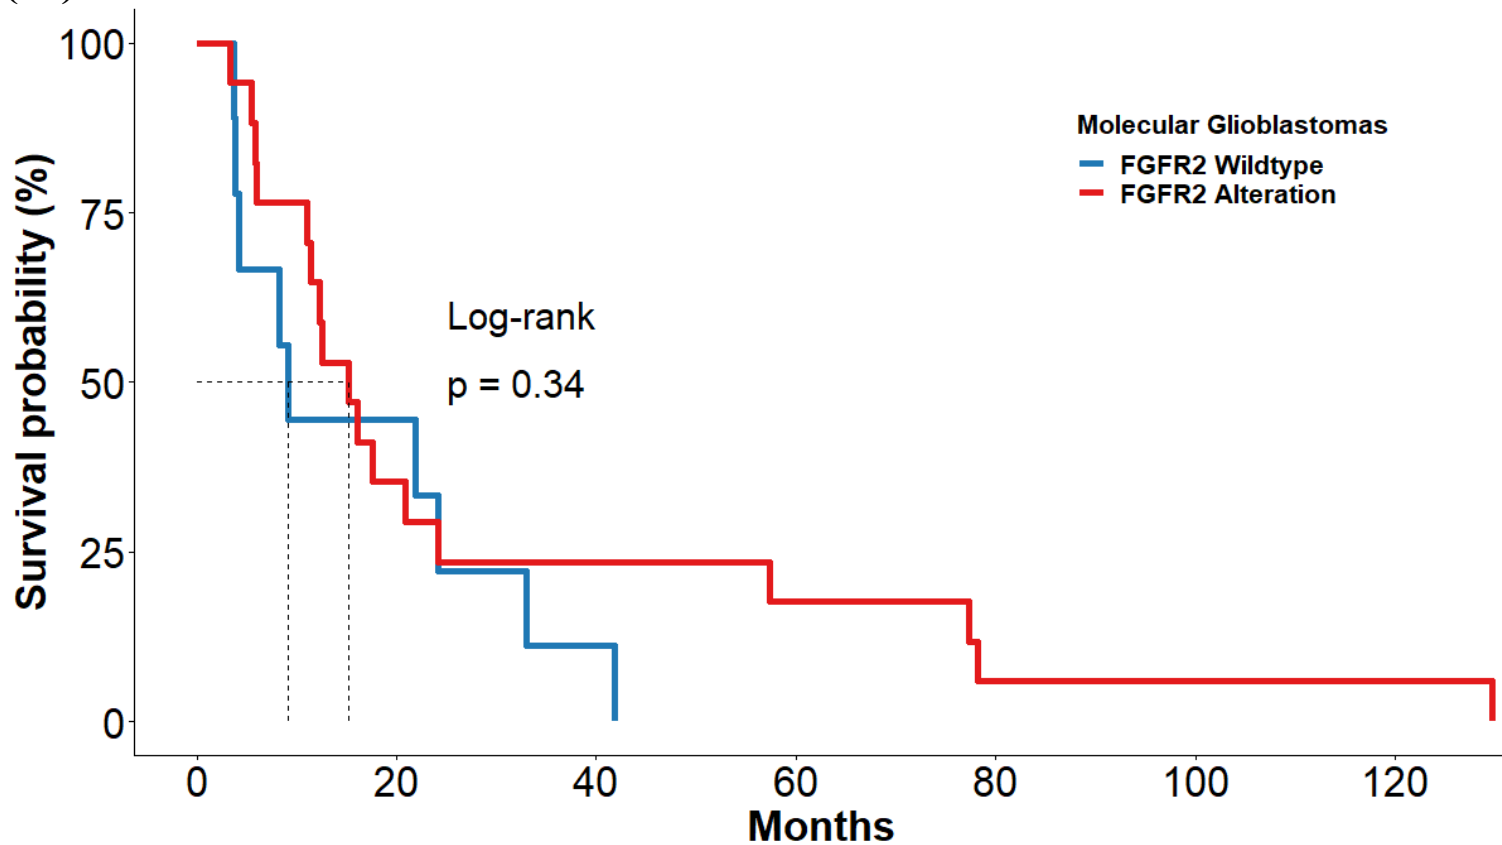

|    |   |   |   |   |   |   |
|----|---|---|---|---|---|---|
| 9  | 4 | 1 | 0 | 0 | 0 | 0 |
| 17 | 6 | 4 | 3 | 1 | 1 | 1 |

(12)

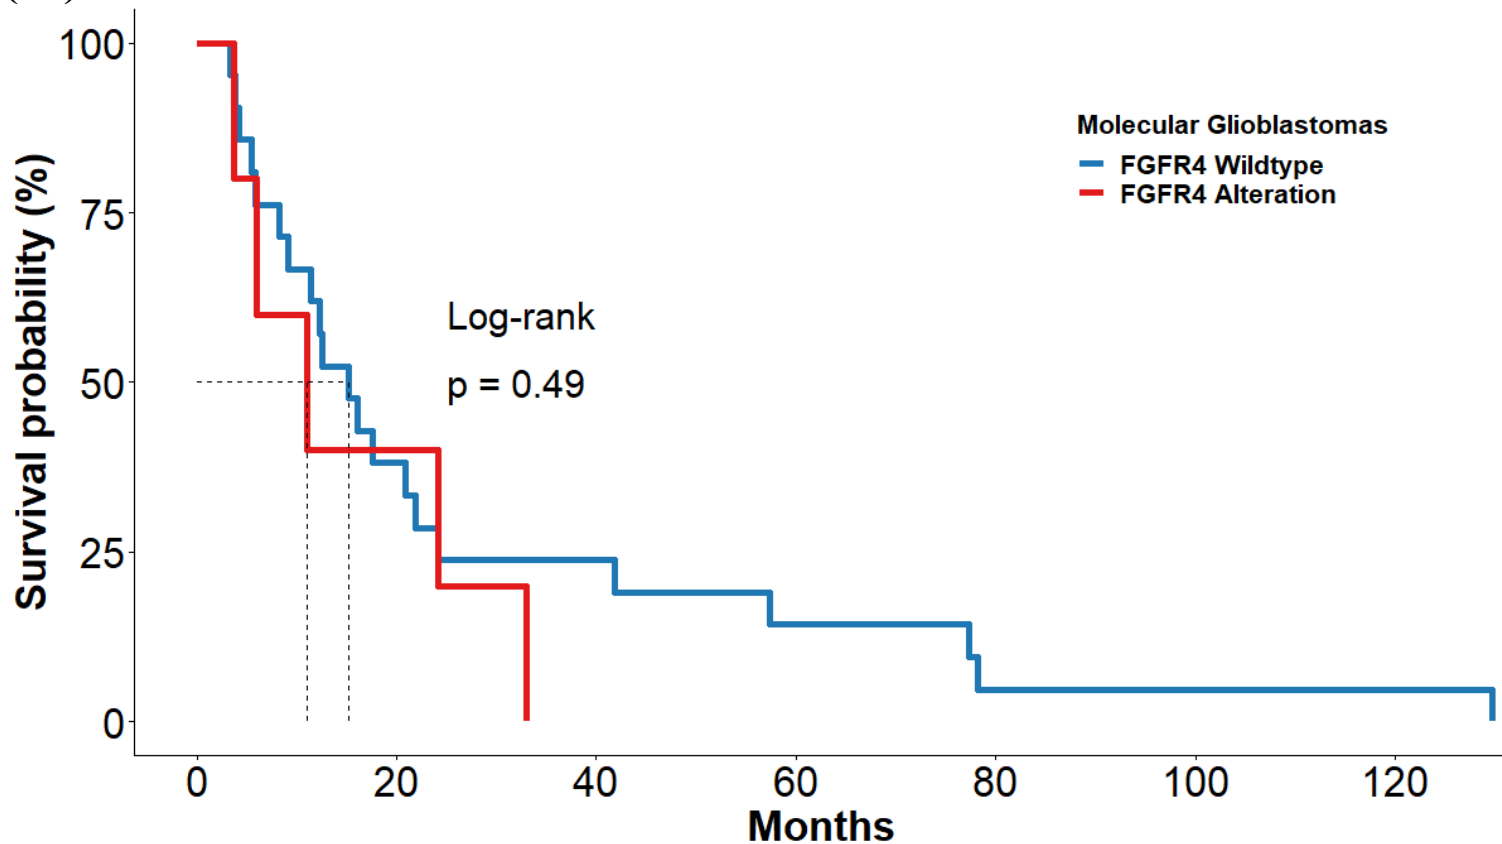

21  
5

8  
2

5  
0

3  
0

1  
0

1  
0

1  
0

(13)

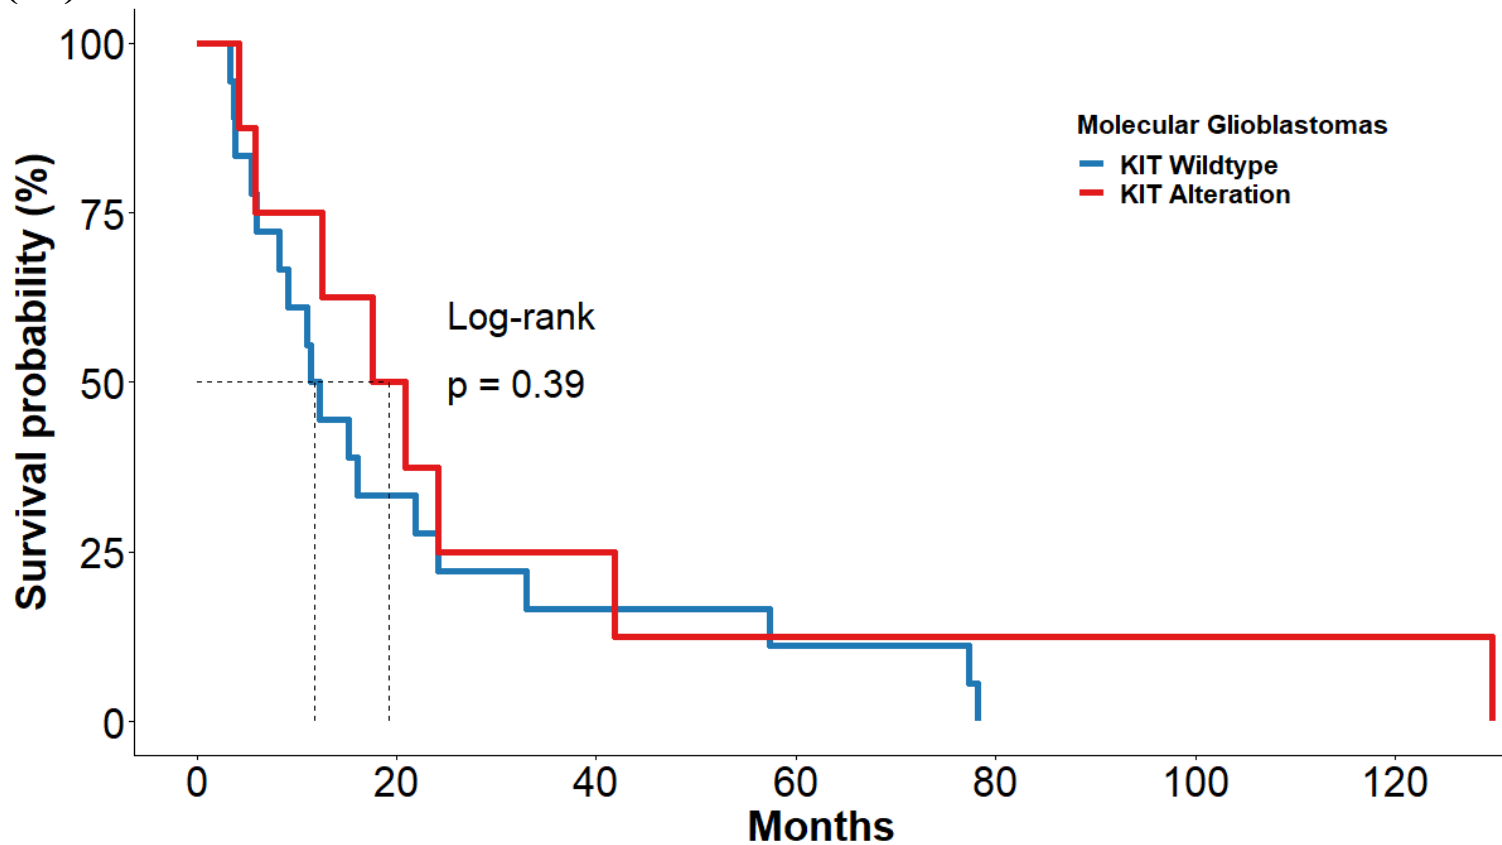

|   |    |   |   |   |   |   |   |
|---|----|---|---|---|---|---|---|
| — | 18 | 6 | 3 | 2 | 0 | 0 | 0 |
| — | 8  | 4 | 2 | 1 | 1 | 1 | 1 |

(14)

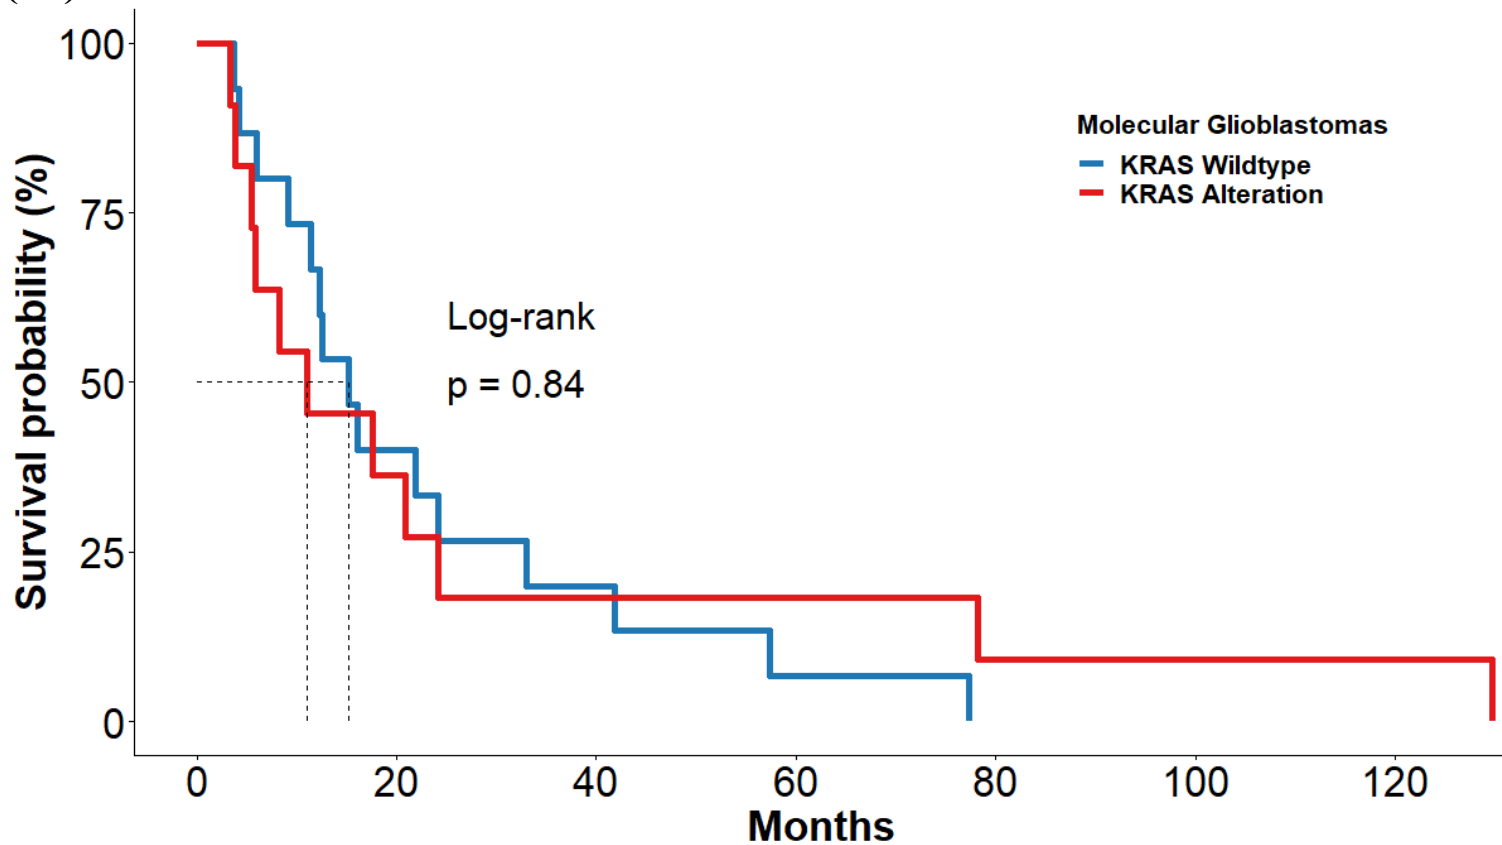

|   |    |   |   |   |   |   |   |
|---|----|---|---|---|---|---|---|
| — | 15 | 6 | 3 | 1 | 0 | 0 | 0 |
| — | 11 | 4 | 2 | 2 | 1 | 1 | 1 |

(15)

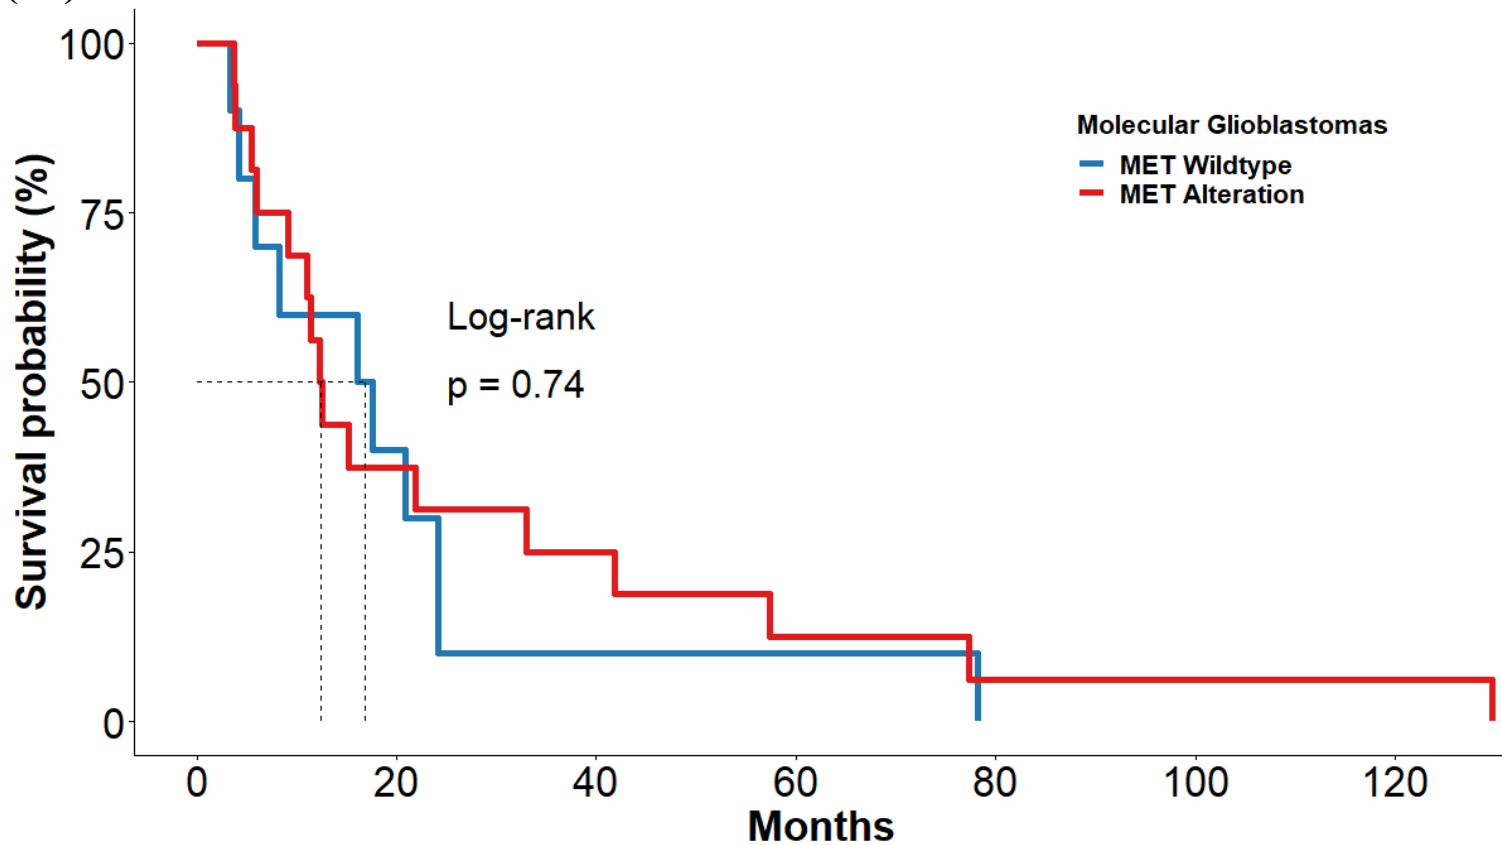

|   |    |   |   |   |   |   |   |
|---|----|---|---|---|---|---|---|
| — | 10 | 4 | 1 | 1 | 0 | 0 | 0 |
| — | 16 | 6 | 4 | 2 | 1 | 1 | 1 |



(16)

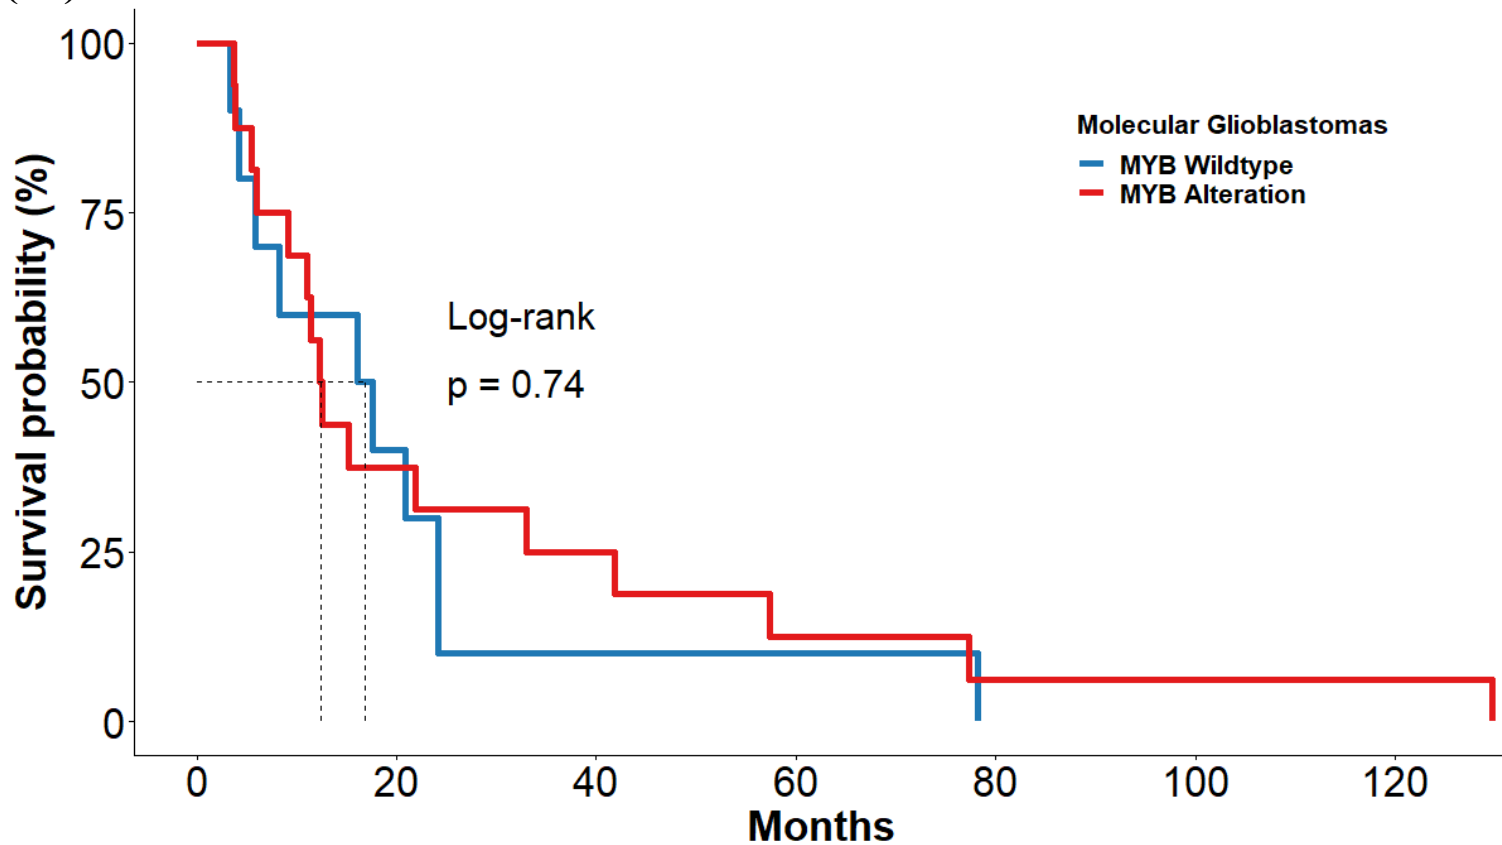

|   |    |   |   |   |   |   |   |
|---|----|---|---|---|---|---|---|
| — | 10 | 4 | 1 | 1 | 0 | 0 | 0 |
| — | 16 | 6 | 4 | 2 | 1 | 1 | 1 |

(17)

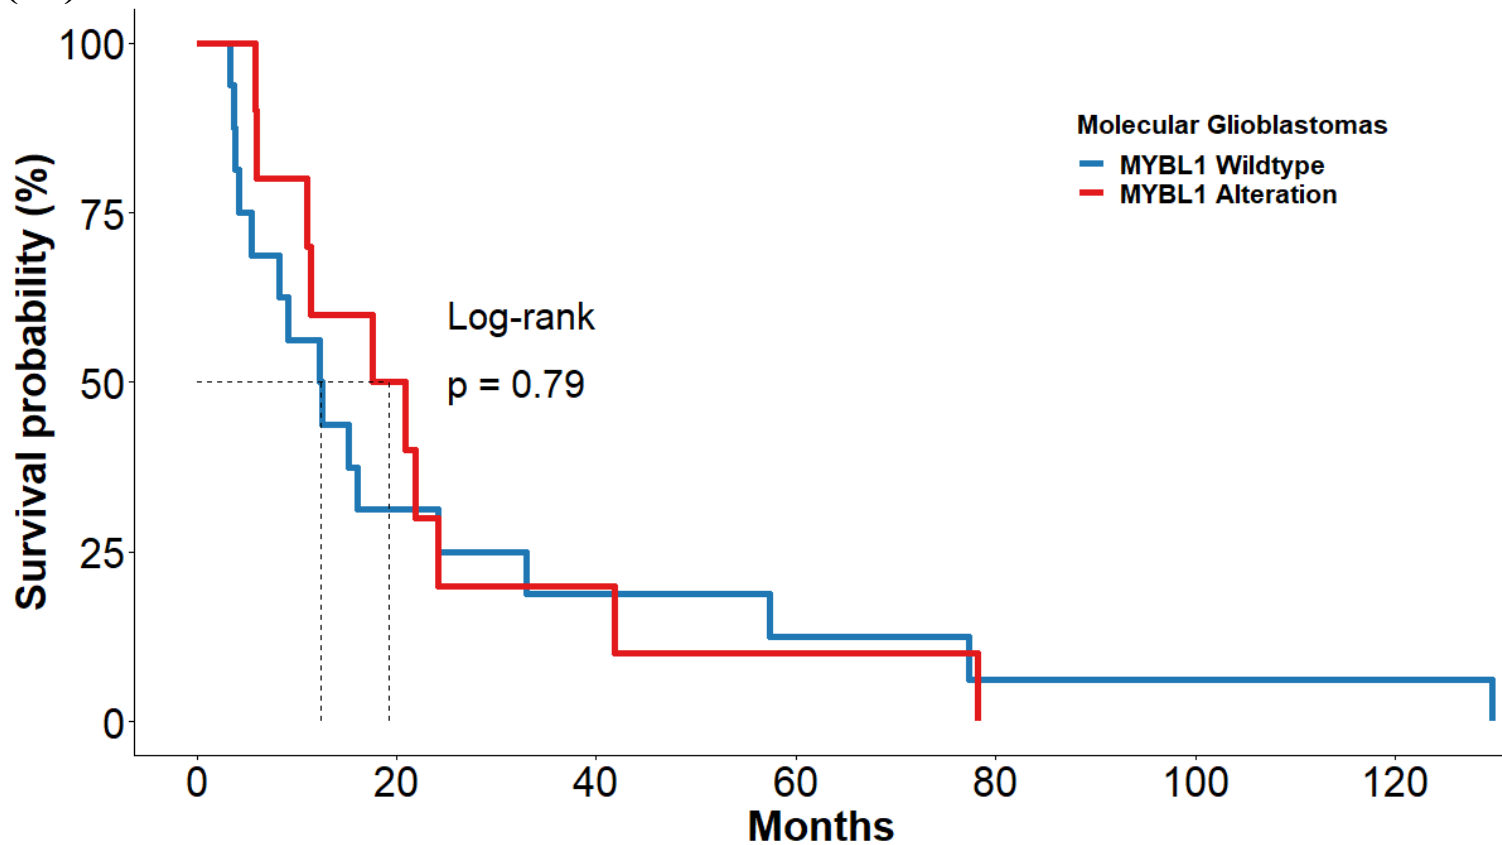

|   |    |   |   |   |   |   |   |
|---|----|---|---|---|---|---|---|
| — | 16 | 5 | 3 | 2 | 1 | 1 | 1 |
| — | 10 | 5 | 2 | 1 | 0 | 0 | 0 |

(18)

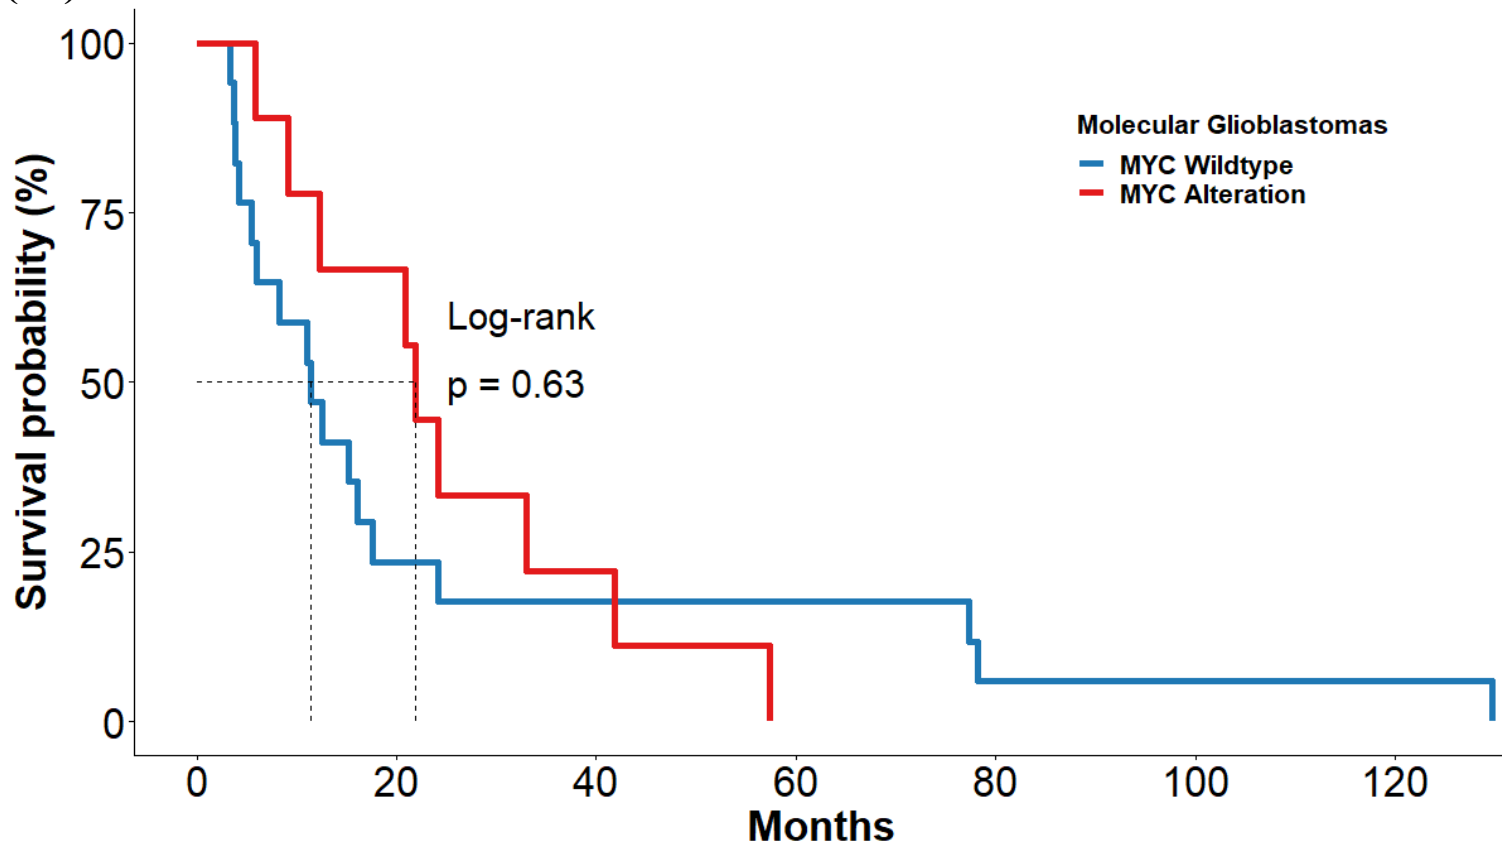

|   |    |   |   |   |   |   |   |
|---|----|---|---|---|---|---|---|
| — | 17 | 4 | 3 | 3 | 1 | 1 | 1 |
| — | 9  | 6 | 2 | 0 | 0 | 0 | 0 |

(19)

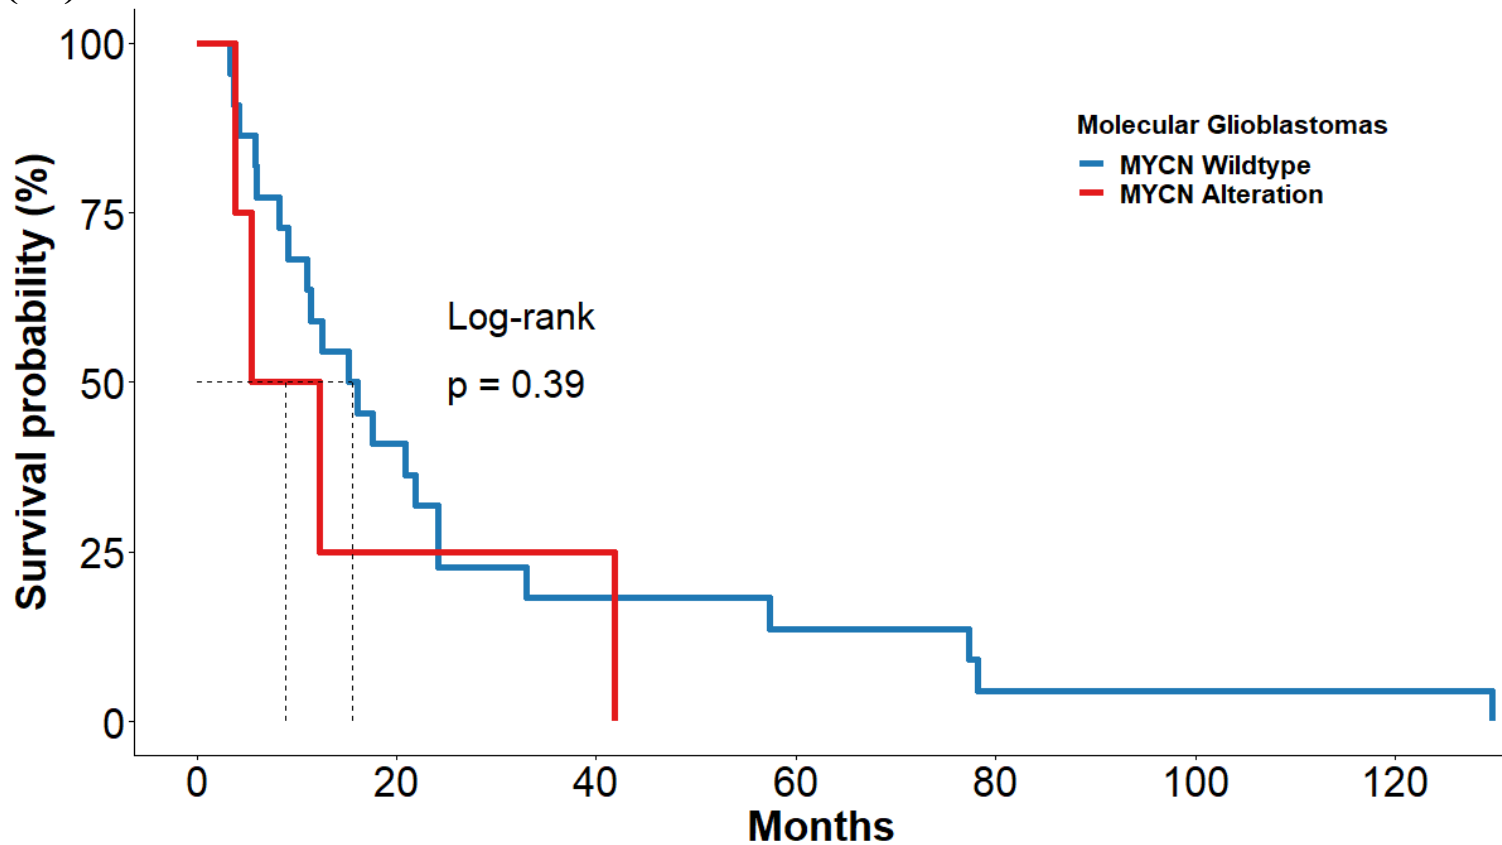

|   |    |   |   |   |   |   |   |
|---|----|---|---|---|---|---|---|
| — | 22 | 9 | 4 | 3 | 1 | 1 | 1 |
| — | 4  | 1 | 1 | 0 | 0 | 0 | 0 |

(20)

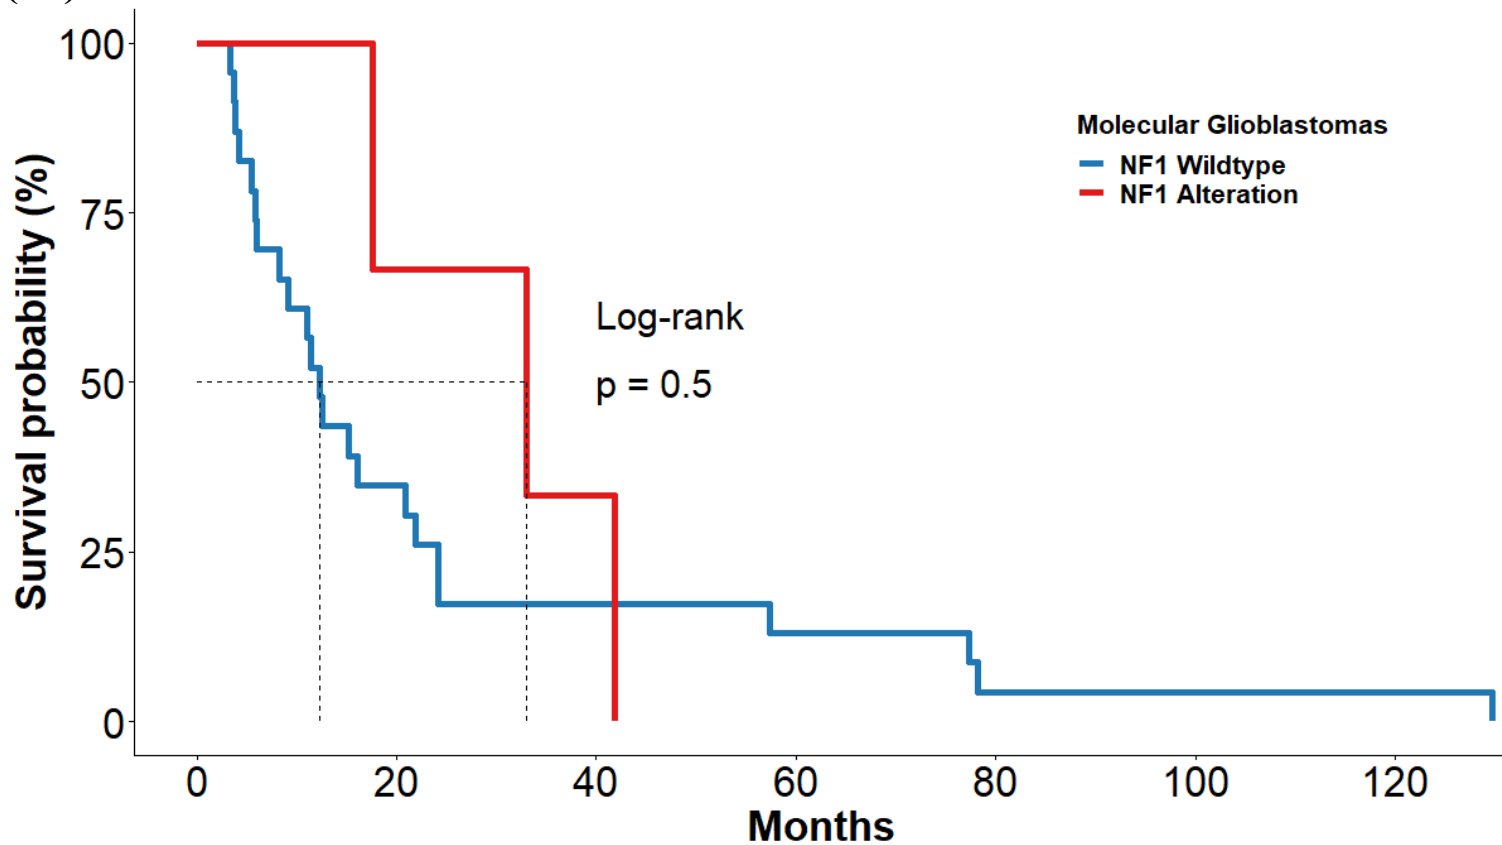

|   |    |   |   |   |   |   |   |
|---|----|---|---|---|---|---|---|
| — | 23 | 8 | 4 | 3 | 1 | 1 | 1 |
| — | 3  | 2 | 1 | 0 | 0 | 0 | 0 |

(21)

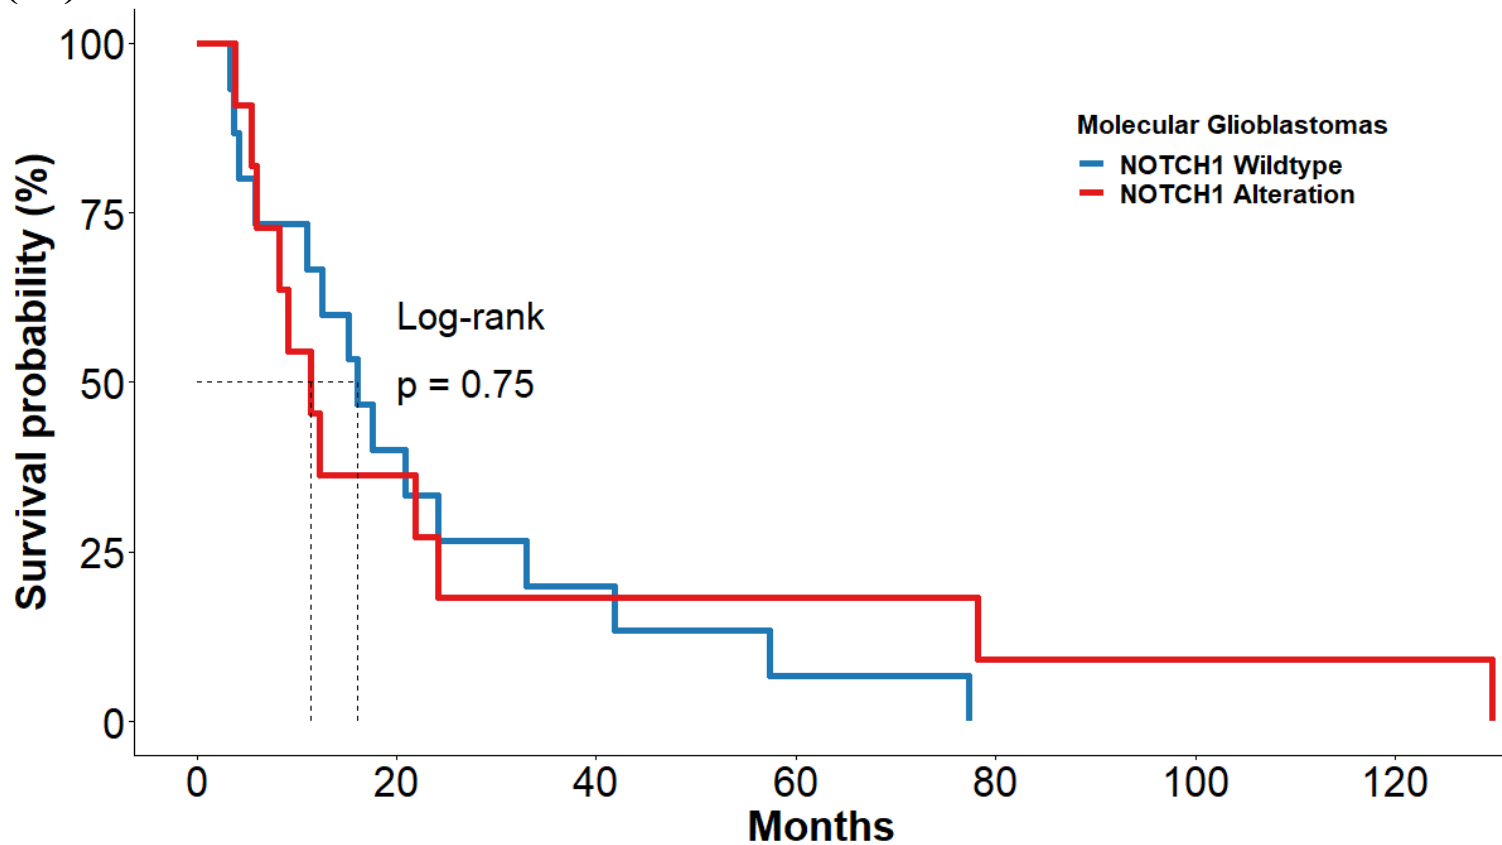

|   |    |   |   |   |   |   |   |
|---|----|---|---|---|---|---|---|
| — | 15 | 6 | 3 | 1 | 0 | 0 | 0 |
| — | 11 | 4 | 2 | 2 | 1 | 1 | 1 |

(22)

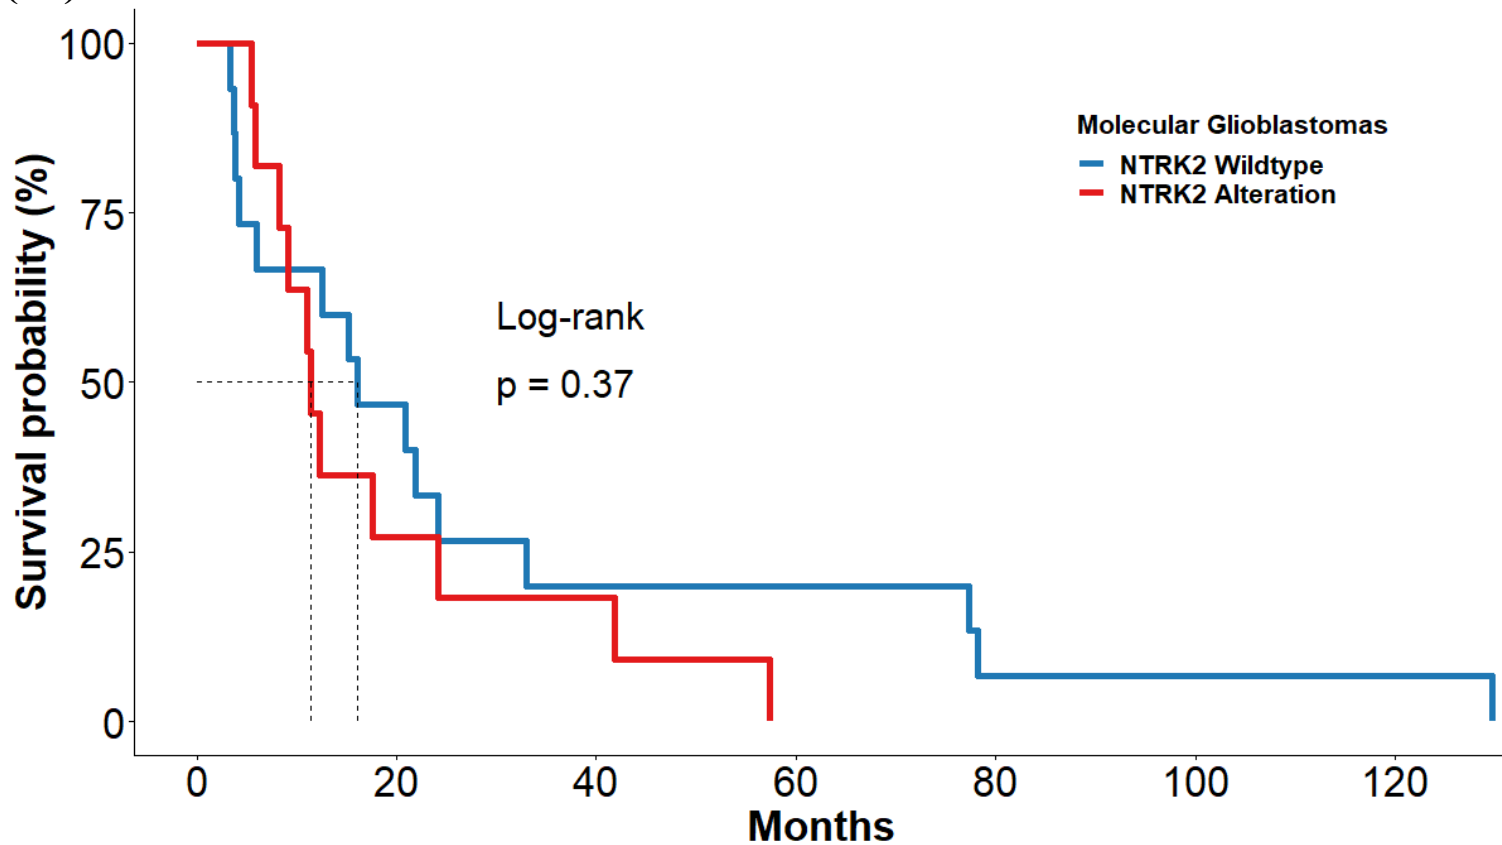

|   |    |   |   |   |   |   |   |
|---|----|---|---|---|---|---|---|
| — | 15 | 7 | 3 | 3 | 1 | 1 | 1 |
| — | 11 | 3 | 2 | 0 | 0 | 0 | 0 |

(23)

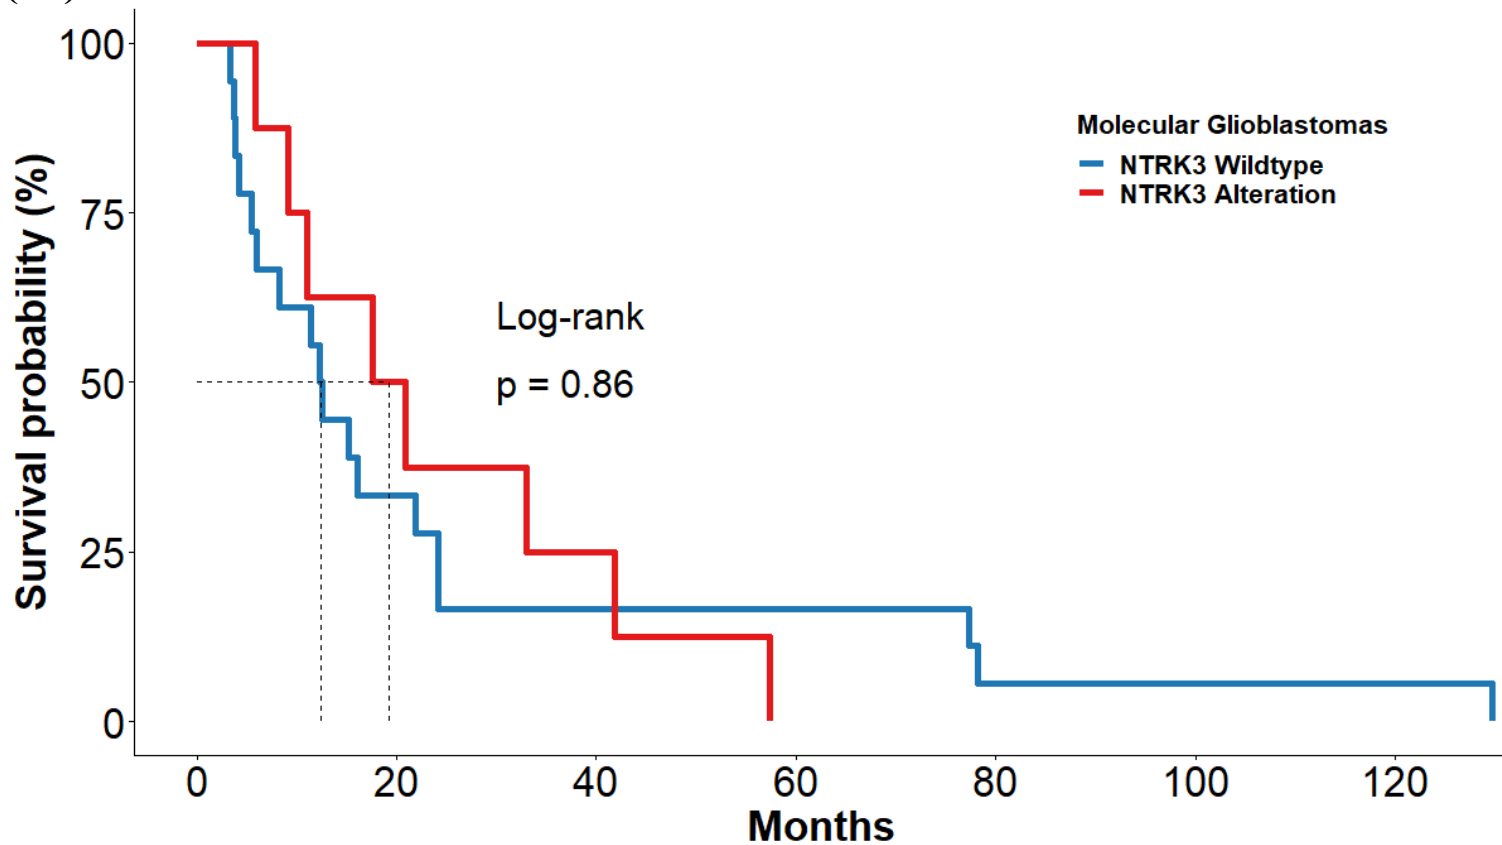

18  
8

6  
4

3  
2

3  
0

1  
0

1  
0

1  
0



(24)

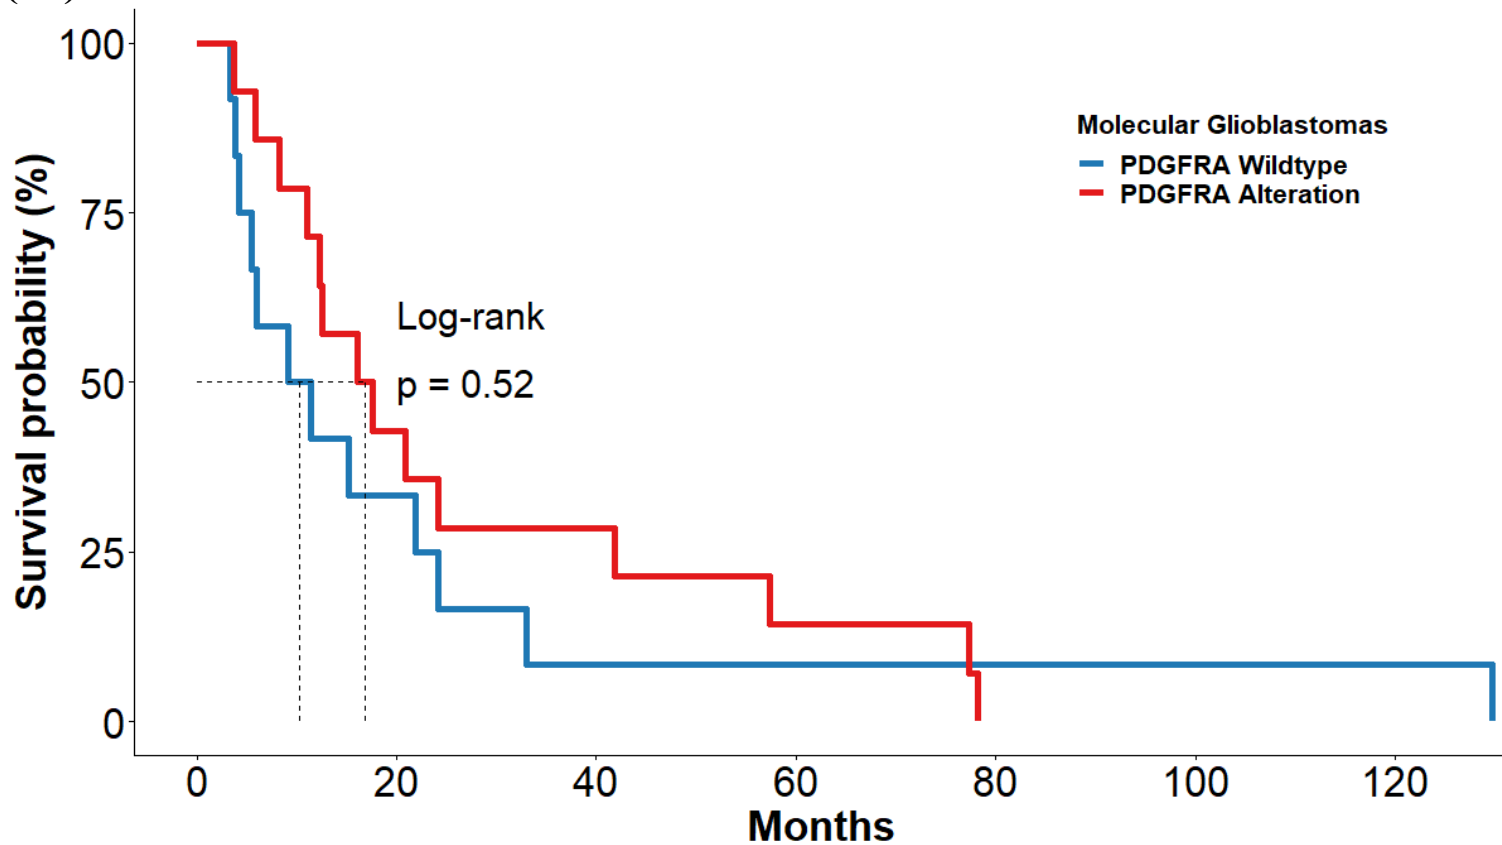

|   |    |   |   |   |   |   |   |
|---|----|---|---|---|---|---|---|
| — | 12 | 4 | 1 | 1 | 1 | 1 | 1 |
| — | 14 | 6 | 4 | 2 | 0 | 0 | 0 |

(25)

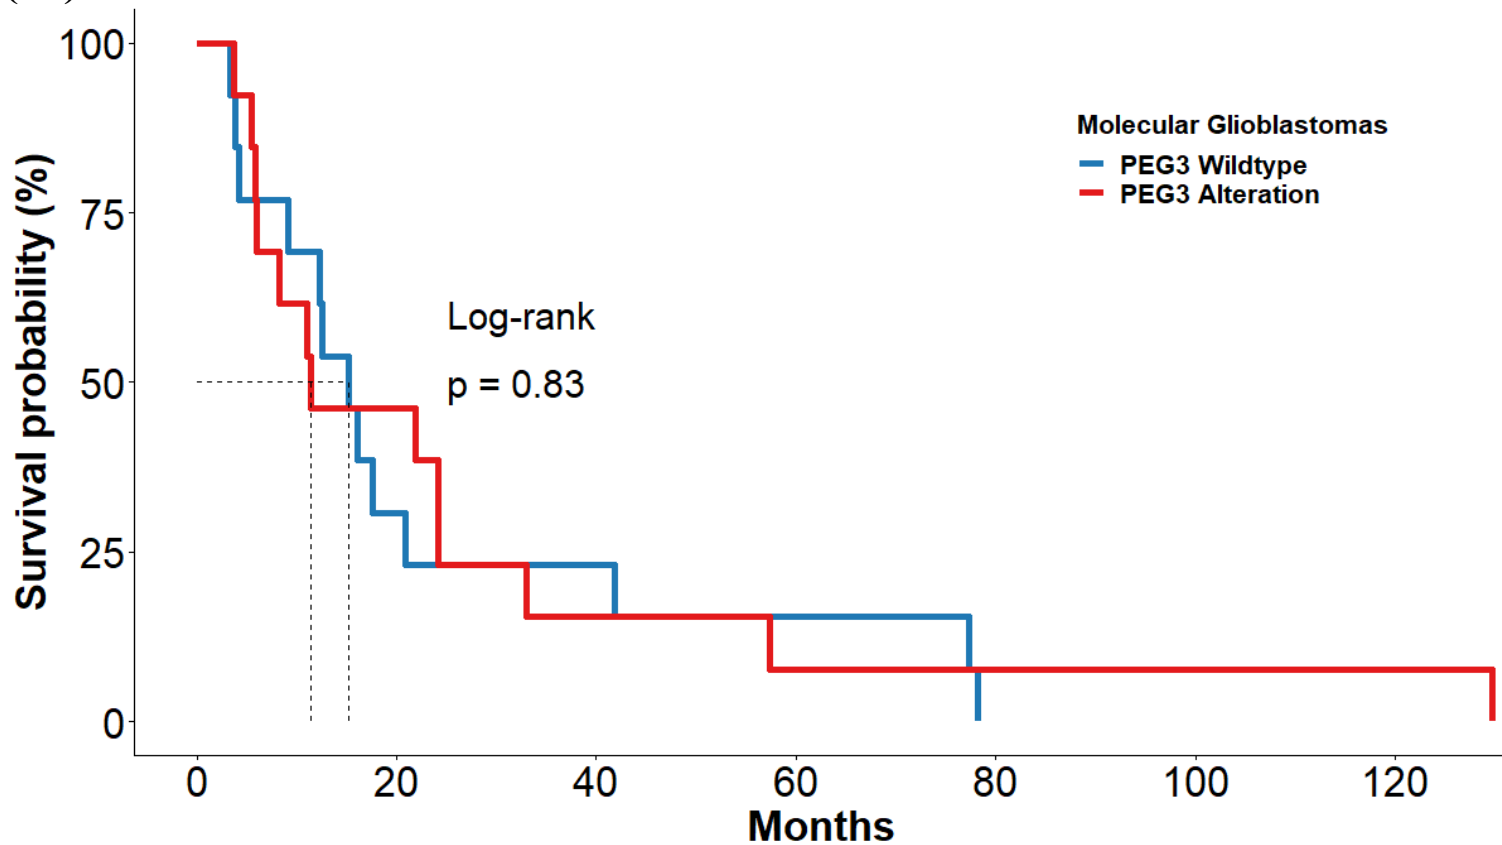

|   |    |   |   |   |   |   |   |
|---|----|---|---|---|---|---|---|
| — | 13 | 4 | 3 | 2 | 0 | 0 | 0 |
| — | 13 | 6 | 2 | 1 | 1 | 1 | 1 |

(26)

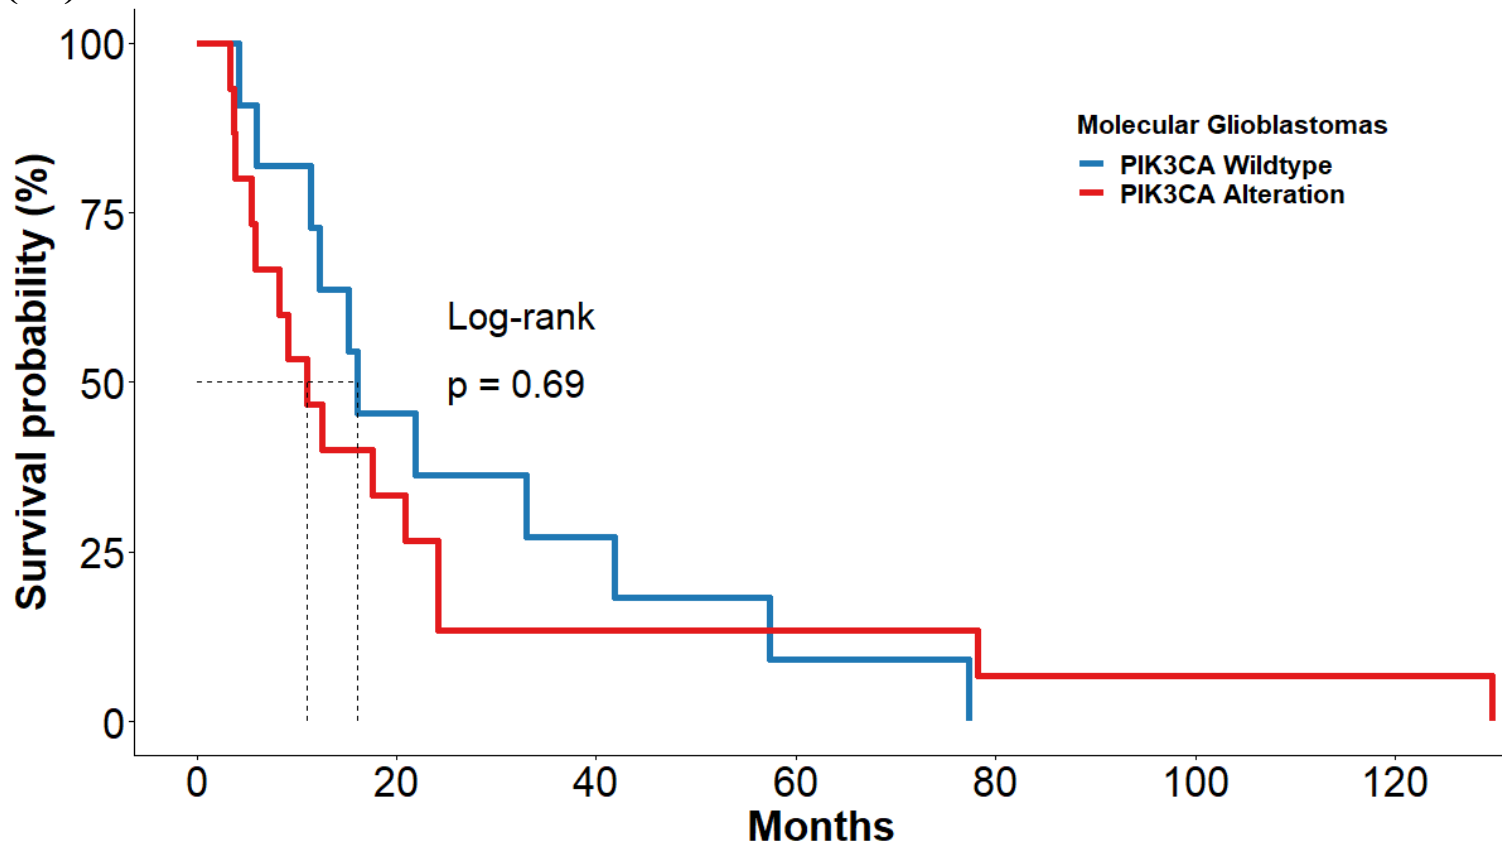

|   |    |   |   |   |   |   |   |
|---|----|---|---|---|---|---|---|
| — | 11 | 5 | 3 | 1 | 0 | 0 | 0 |
| — | 15 | 5 | 2 | 2 | 1 | 1 | 1 |

(27)

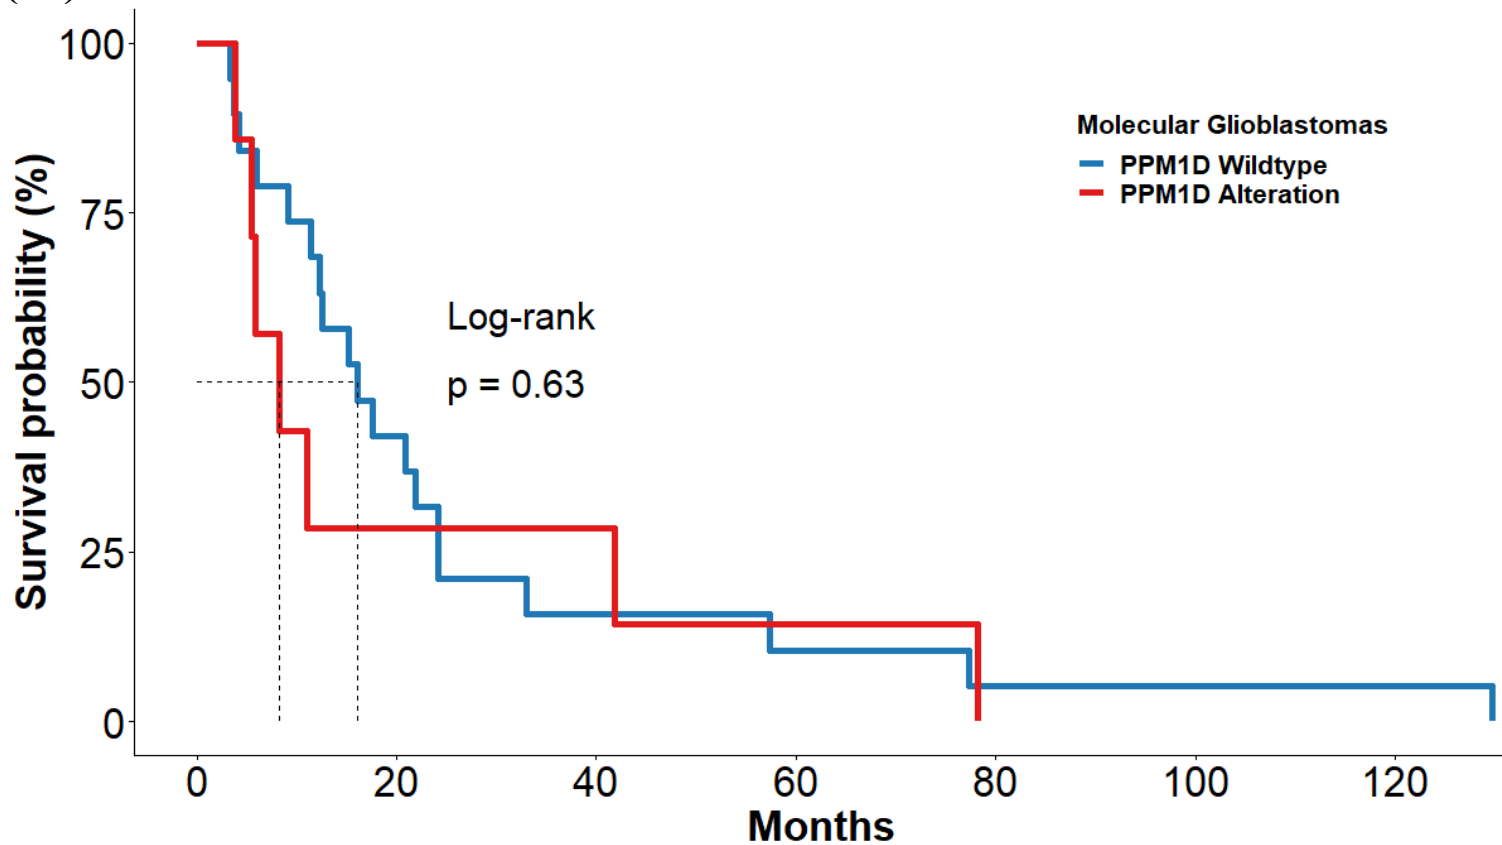

|   |    |   |   |   |   |   |   |
|---|----|---|---|---|---|---|---|
| — | 19 | 8 | 3 | 2 | 1 | 1 | 1 |
| — | 7  | 2 | 2 | 1 | 0 | 0 | 0 |

(28)

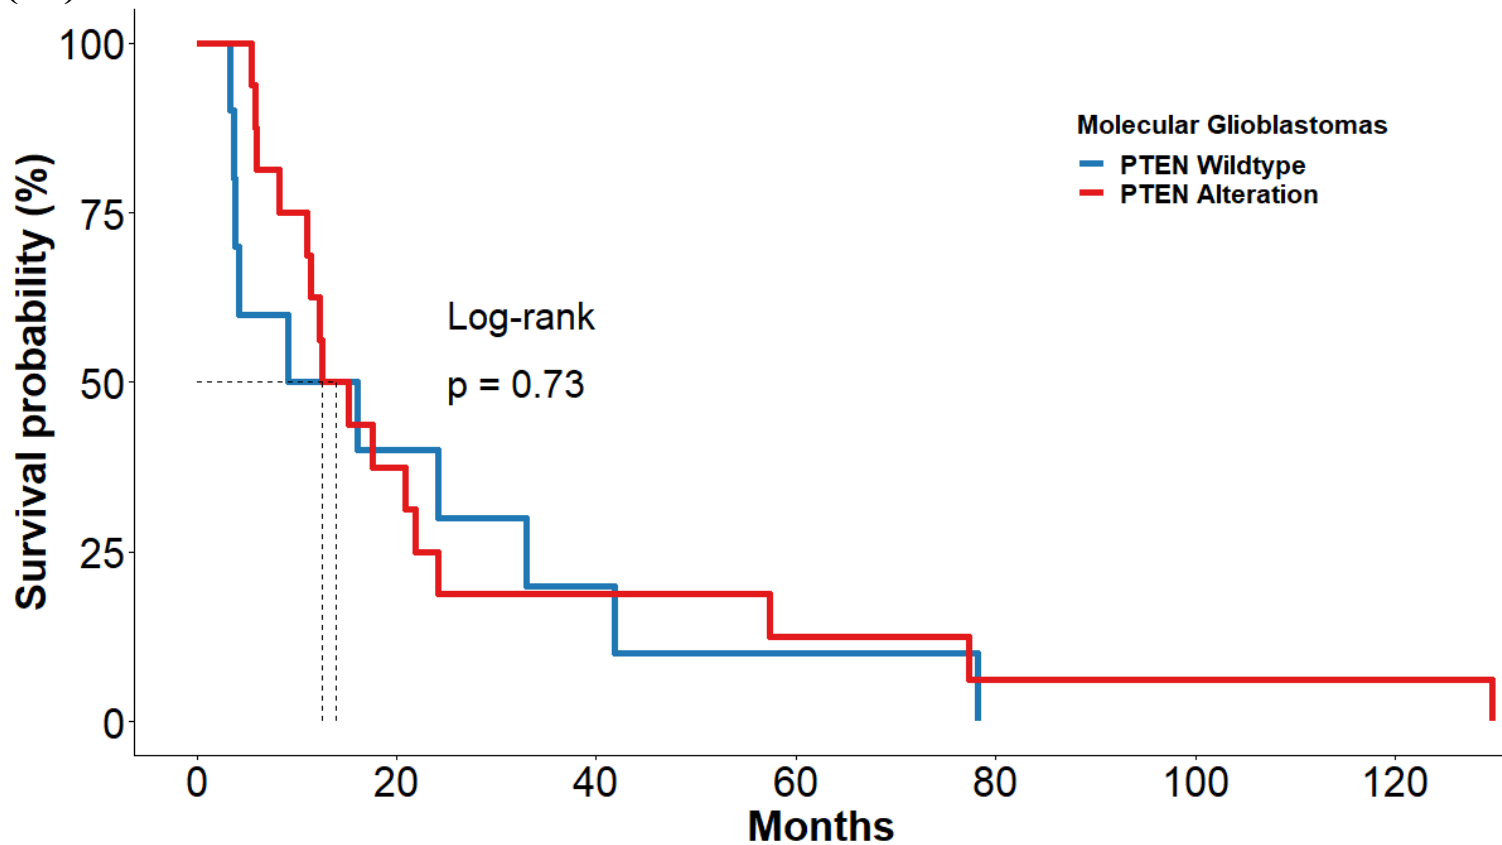

|   |    |   |   |   |   |   |   |
|---|----|---|---|---|---|---|---|
| — | 10 | 4 | 2 | 1 | 0 | 0 | 0 |
| — | 16 | 6 | 3 | 2 | 1 | 1 | 1 |

(29)

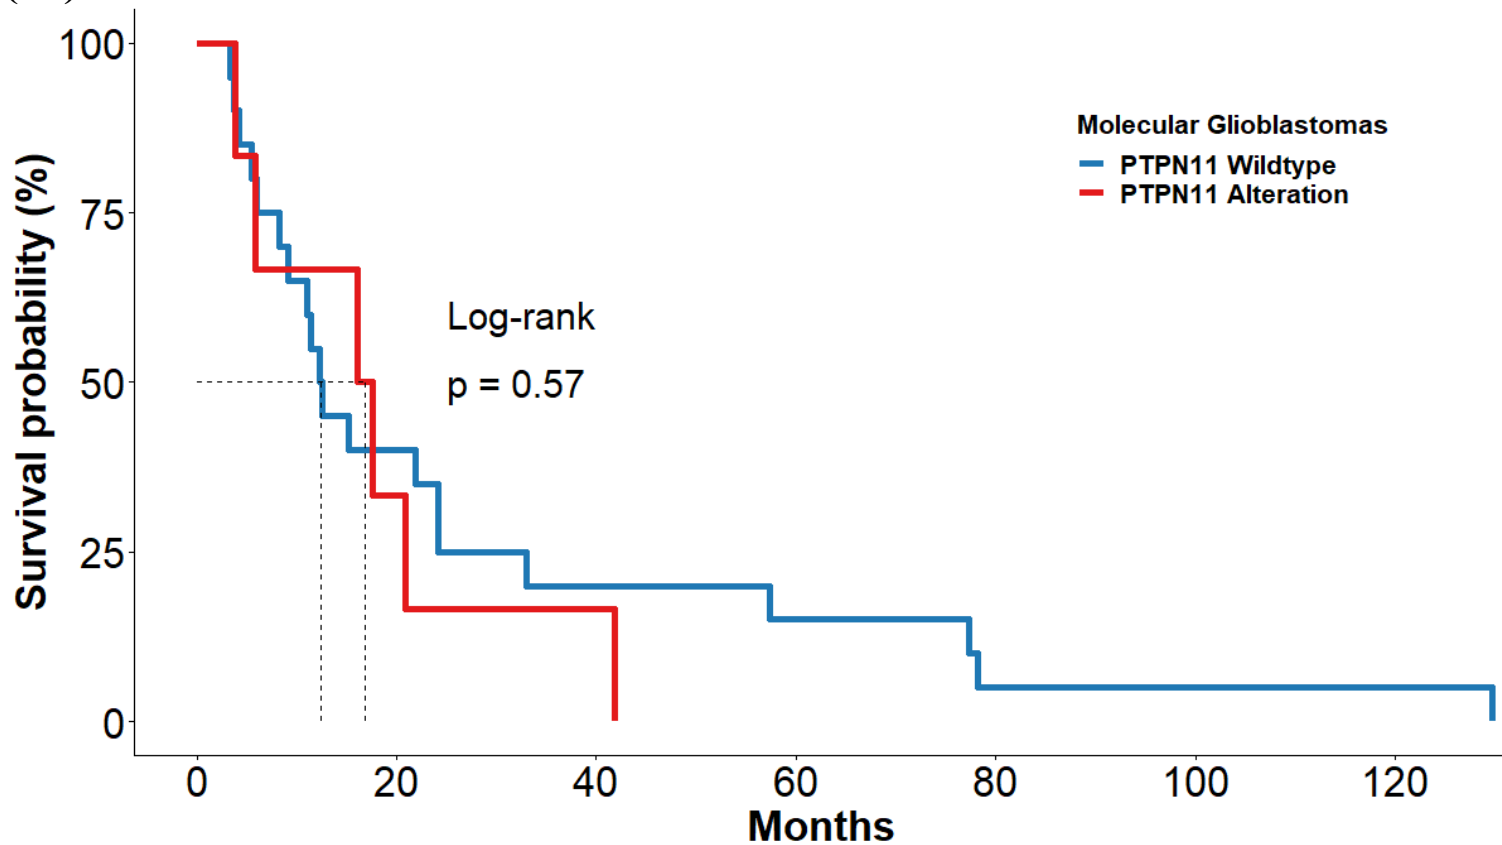

|   |    |   |   |   |   |   |   |
|---|----|---|---|---|---|---|---|
| — | 20 | 8 | 4 | 3 | 1 | 1 | 1 |
| — | 6  | 2 | 1 | 0 | 0 | 0 | 0 |

(30)

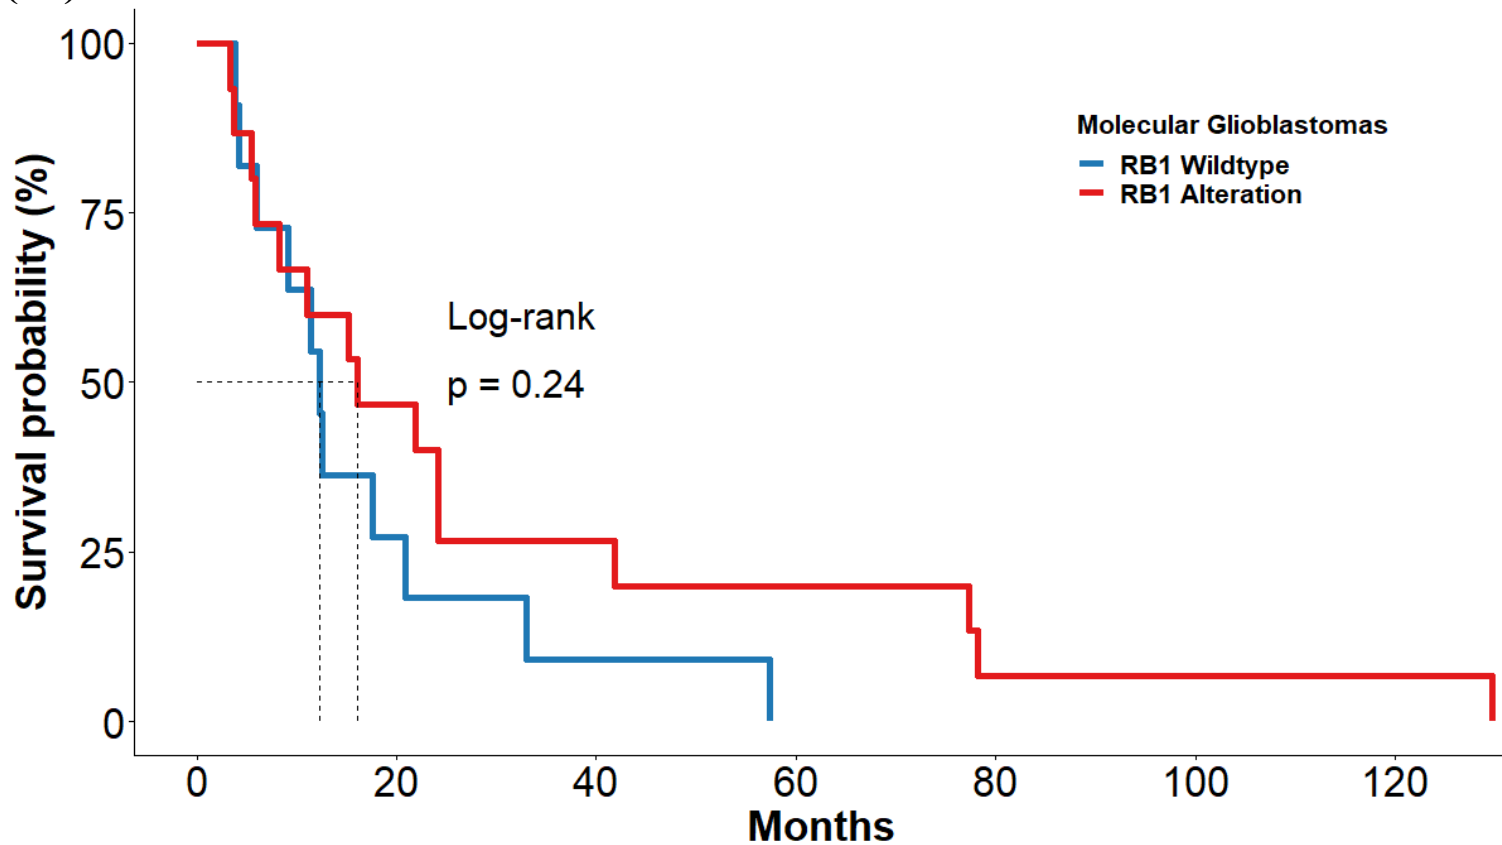

|   |    |   |   |   |   |   |   |
|---|----|---|---|---|---|---|---|
| — | 11 | 3 | 1 | 0 | 0 | 0 | 0 |
| — | 15 | 7 | 4 | 3 | 1 | 1 | 1 |

(31)

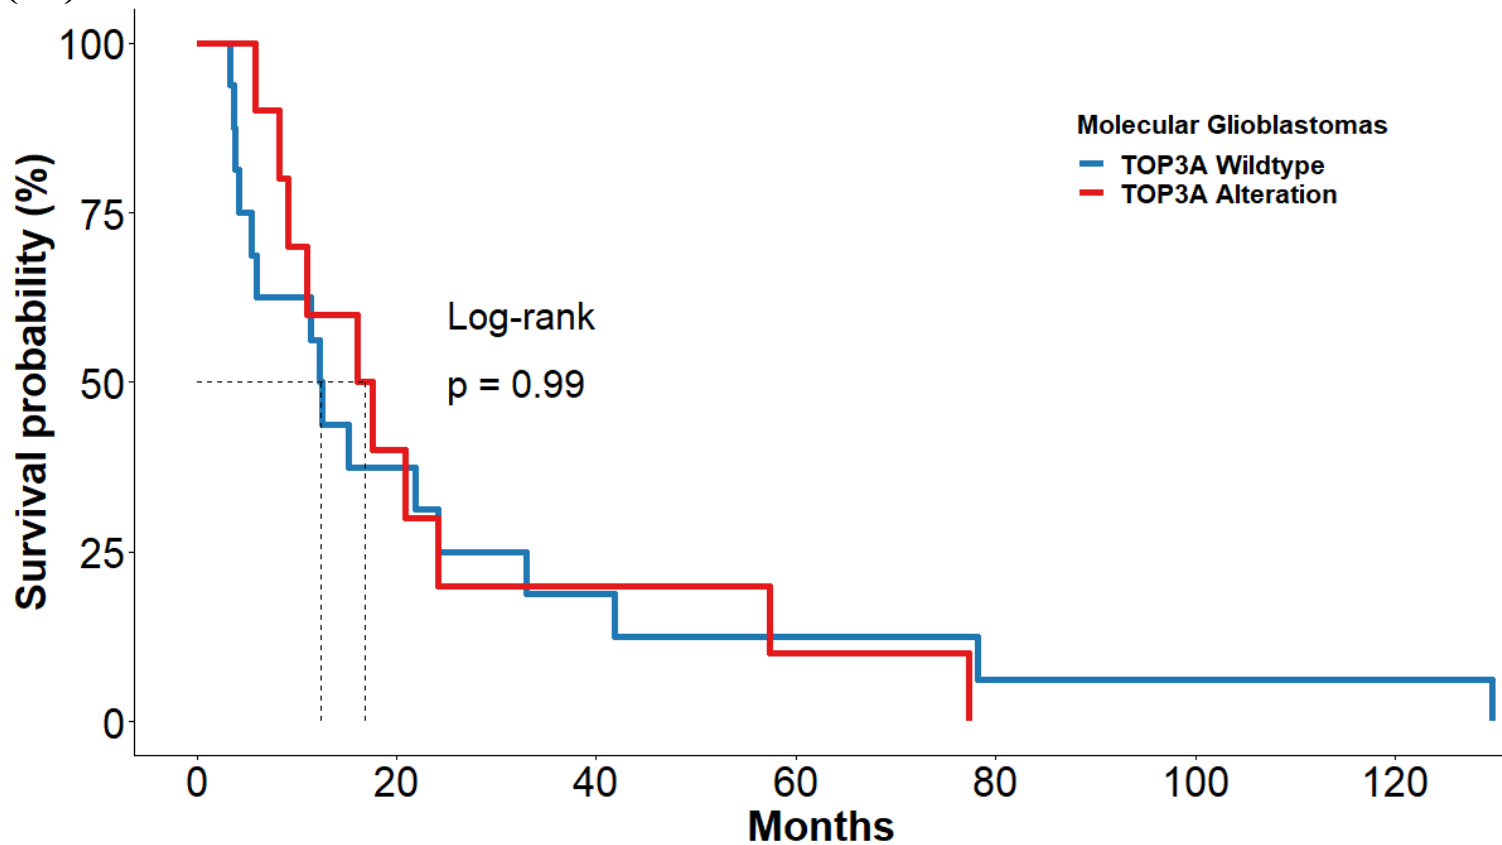

|   |    |   |   |   |   |   |   |
|---|----|---|---|---|---|---|---|
| — | 16 | 6 | 3 | 2 | 1 | 1 | 1 |
| — | 10 | 4 | 2 | 1 | 0 | 0 | 0 |
